# Supplementary material for: Genetic Diversity and Elite Allele Mining for Grain Traits in Rice (Oryza sativa L.) by Association Mapping
Source: Front Plant Sci. 2016 Jun 7;7:787. doi: 10.3389/fpls.2016.00787 (PMC4896222; doi:10.3389/fpls.2016.00787)
Supplement: Supplementary file 7 [file Table7.XLSX]

## Sheet: S7-GL
		Supplementary Table S7 Raw data of grain length (mm) of 628 accessions
				2013 GL/mm				2014 GL/mm
		Code	Accessions	Replication 1	Replication 2	Average		Replication 1	Replication 2	Average
		W1	Yazihuang	7.31467	7.031	7.17283		7.004	7.31467	7.15933
		W2	Hongmangzaodao	8.487	8.25867	8.37283		8.23167	8.487	8.35933
		W3	Wanhuangdao	7.91383	7.64917	7.7815		7.62217	7.91383	7.768
		W4	Guozinuo	7.22467	6.92967	7.07717		6.90267	7.22467	7.06367
		W5	Shuijingbaidao	7.3963	7.13697	7.26663		7.10997	7.3963	7.25313
		W6	Wumangzaodao	9.1495	8.85217	9.00083		8.82517	9.1495	8.98733
		W7	Sanbailitou	7.01133	6.73653	6.87393		6.70953	7.01133	6.86043
		W8	Cuyingwanyangdao	7.454	7.194	7.324		7.167	7.454	7.3105
		W9	Yanglingdao	6.82567	6.56233	6.694		6.53533	6.82567	6.6805
		W10	Wanyedao	8.63087	8.35387	8.49237		8.32687	8.63087	8.47887
		W11	Qiaobinghuang	7.86713	7.59547	7.7313		7.56847	7.86713	7.7178
		W12	Tiejingqing	8.05513	7.7768	7.91597		7.7498	8.05513	7.90247
		W13	Xiaobaiyedao	8.21667	7.94167	8.07917		7.91467	8.21667	8.06567
		W14	Baoxintaihuqing	8.29767	8.022	8.15983		7.995	8.29767	8.14633
		W15	Jiangfeng4	7.19567	6.92767	7.06167		6.90067	7.19567	7.04817
		W16	Sujing4	7.706	7.439	7.5725		7.412	7.706	7.559
		W17	Aizhongluohanhuang	7.62233	7.366	7.49417		7.339	7.62233	7.48067
		W18	Baodao	7.3819	7.11557	7.24873		7.08857	7.3819	7.23523
		W19	Wanmuxiqiu	7.546	7.27133	7.40867		7.24433	7.546	7.39517
		W20	Huangsanshi	8.58633	8.31667	8.4515		8.28967	8.58633	8.438
		W21	Erheidao	7.8878	7.6238	7.7558		7.5968	7.8878	7.7423
		W22	Xiaoqingzhong	7.99947	7.73147	7.86547		7.70447	7.99947	7.85197
		W23	Zaoguangtou	7.34033	7.08167	7.211		7.05467	7.34033	7.1975
		W24	Xiaoluohanhuang	7.47967	7.19533	7.3375		7.16833	7.47967	7.324
		W25	Souzhouqing	7.8622	7.5902	7.7262		7.5632	7.8622	7.7127
		W26	Wanluli	7.52333	7.245	7.38417		7.218	7.52333	7.37067
		W27	Wanbaguo	7.65727	7.38293	7.5201		7.35593	7.65727	7.5066
		W28	Ebusinuodao	7.12967	6.849	6.98933		6.822	7.12967	6.97583
		W29	Laodiegu	7.36133	7.09033	7.22583		7.06333	7.36133	7.21233
		W30	Yefenghuang	7.09767	6.822	6.95983		6.795	7.09767	6.94633
		W31	Chenjiazhong	7.59333	7.31833	7.45583		7.29133	7.59333	7.44233
		W32	Zaoheitouhong	7.01567	6.765	6.89033		6.738	7.01567	6.87683
		W33	Luohanhuang	8.02203	7.7457	7.88387		7.7187	8.02203	7.87037
		W34	Longgouzhong	8.03247	7.75847	7.89547		7.73147	8.03247	7.88197
		W35	Shiluqing	7.26233	6.978	7.12017		6.951	7.26233	7.10667
		W36	Ligengqing	7.13367	6.853	6.99333		6.826	7.13367	6.97983
		W37	Heitouhong	7.56786	7.29452	7.43119		7.26752	7.56786	7.41769
		W38	Laolaihong	7.548	7.27133	7.40967		7.24433	7.548	7.39617
		W39	Erlibie	7.57333	7.30333	7.43833		7.27633	7.57333	7.42483
		W40	Jinguhuang	7.33767	7.069	7.20333		7.042	7.33767	7.18983
		W41	Cuganhuangdao	7.04867	6.75767	6.90317		6.73067	7.04867	6.88967
		W42	Zaoshirihuangdao	7.125	6.82867	6.97683		6.80167	7.125	6.96333
		W43	Shengtangqing	7.39133	7.122	7.25667		7.095	7.39133	7.24317
		W44	Xiaomandao	7.57467	7.29967	7.43717		7.27267	7.57467	7.42367
		W45	Shengtangdao	7.85067	7.58033	7.7155		7.55333	7.85067	7.702
		W46	Wanmandao	7.57933	7.30333	7.44133		7.27633	7.57933	7.42783
		W47	Nantouzhong	7.21123	6.9249	7.06807		6.8979	7.21123	7.05457
		W48	Daniaodao	7.83	7.54633	7.68817		7.51933	7.83	7.67467
		W49	Kongqueqing	7.27667	7.00067	7.13867		6.97367	7.27667	7.12517
		W50	Kaiqing	8.081	7.805	7.943		7.778	8.081	7.9295
		W51	Manyedao	7.5959	7.30623	7.45107		7.27923	7.5959	7.43757
		W52	Baikenuo	8.1662	7.88253	8.02437		7.85553	8.1662	8.01087
		W53	Baimangnuo	7.84567	7.56467	7.70517		7.53767	7.84567	7.69167
		W54	Xiangzhunuo	7.195	6.91067	7.05283		6.88367	7.195	7.03933
		W55	Yaxienuo	7.19533	6.91867	7.057		6.89167	7.19533	7.0435
		W56	Xianhui429	7.86333	7.584	7.72367		7.557	7.86333	7.71017
		W57	Zijianxian3	8.26867	7.98667	8.12767		7.95967	8.26867	8.11417
		W58	Huangsandannuo	7.31833	7.037	7.17767		7.01	7.31833	7.16417
		W59	Jia159	6.96833	6.69133	6.82983		6.66433	6.96833	6.81633
		W60	Sidao10	7.61933	7.34167	7.4805		7.31467	7.61933	7.467
		W61	Wuqiang	7.33957	7.0629	7.20123		7.0359	7.33957	7.18773
		W62	Wuyujing3	7.13267	6.85033	6.9915		6.82333	7.13267	6.978
		W63	Xiushui04	6.845	6.5324	6.6887		6.5054	6.845	6.6752
		W64	Zhendao88	7.38867	7.11133	7.25		7.08433	7.38867	7.2365
		W65	Zhendao6	7.4009	7.1239	7.2624		7.0969	7.4009	7.2489
		W66	Taijing9	7.76667	7.492	7.62933		7.465	7.76667	7.61583
		W67	Taijing16xuanAC	7.72833	7.44267	7.5855		7.41567	7.72833	7.572
		W68	Taijing16xuanzi	7.5349	7.2519	7.3934		7.2249	7.5349	7.3799
		W69	Diantun502xuanzao	7.4936	7.2206	7.3571		7.1936	7.4936	7.3436
		W70	Hongdao35	10.16	9.88233	10.0212		9.85533	10.16	10.0077
		W71	Hongdao37	7.2714	6.9954	7.1334		6.9684	7.2714	7.1199
		W72	Zijianjingnuo	7.25267	6.97533	7.114		6.94833	7.25267	7.1005
		W73	Nannongjing62401	7.12833	6.84967	6.989		6.82267	7.12833	6.9755
		W74	Tongjing109	9.78	9.501	9.6405		9.474	9.78	9.627
		W75	Yangdao6	10.0003	9.722	9.86117		9.695	10.0003	9.84767
		W76	Nignjing1	7.8388	7.5758	7.7073		7.5488	7.8388	7.6938
		W77	Wujing15	7.83667	7.558	7.69733		7.531	7.83667	7.68383
		W78	Wuxiangjing14	8.56867	8.30567	8.43717		8.27867	8.56867	8.42367
		W79	Xudao3	7.77167	7.49967	7.63567		7.47267	7.77167	7.62217
		W80	Nannongjing003	8.00033	7.713	7.85667		7.686	8.00033	7.84317
		W81	Nannongjing005	6.96367	6.68433	6.824		6.65733	6.96367	6.8105
		W82	5jing20	7.259	6.98533	7.12217		6.95833	7.259	7.10867
		W83	5jing15	8.03433	7.75633	7.89533		7.72933	8.03433	7.88183
		W84	molingjing	7.59033	7.318	7.45417		7.291	7.59033	7.44067
		W85	5jing03	7.87167	7.588	7.72983		7.561	7.87167	7.71633
		W86	5jing68	7.714	7.414	7.564		7.387	7.714	7.5505
		W87	Xudao4	7.44957	7.16923	7.3094		7.14223	7.44957	7.2959
		W88	Xudao5	7.30267	7.02833	7.1655		7.00133	7.30267	7.152
		W89	Huaidao9	7.93467	7.67833	7.8065		7.65133	7.93467	7.793
		W90	Yandao6	7.82233	7.54133	7.68183		7.51433	7.82233	7.66833
		W91	Yangguang200	7.29423	7.0179	7.15607		6.9909	7.29423	7.14257
		W92	Lianjing2	7.4859	7.19657	7.34123		7.16957	7.4859	7.32773
		W93	Xiushui79	7.256	6.98267	7.11933		6.95567	7.256	7.10583
		W94	Cbao	7.14357	6.85657	7.00007		6.82957	7.14357	6.98657
		W95	Nipponbare	7.28533	7.00733	7.14633		6.98033	7.28533	7.13283
		W96	Zhen9424	7.13133	6.84733	6.98933		6.82033	7.13133	6.97583
		W97	Wuyujing7	7.72133	7.44633	7.58383		7.41933	7.72133	7.57033
		W98	Yanjing8	7.424	7.134	7.279		7.107	7.424	7.2655
		W99	Zhengdao18	7.34023	7.0619	7.20107		7.0349	7.34023	7.18757
		W100	Huaidao11	7.56617	7.29783	7.432		7.27083	7.56617	7.4185
		W101	Shengdao808	7.29767	7.023	7.16033		6.996	7.29767	7.14683
		W102	Shengdao14	7.20533	6.928	7.06667		6.901	7.20533	7.05317
		W103	Yujing6	7.29987	7.03253	7.1662		7.00553	7.29987	7.1527
		W104	Huaidao8	7.56567	7.29633	7.431		7.26933	7.56567	7.4175
		W105	Jindao12	7.37267	7.09933	7.236		7.07233	7.37267	7.2225
		W106	Wandao68	7.551	7.276	7.4135		7.249	7.551	7.4
		W107	Xudao2	7.481	7.19867	7.33983		7.17167	7.481	7.32633
		W108	Sujing353	7.93633	7.64933	7.79283		7.62233	7.93633	7.77933
		W109	Xiangjing9407	7.17867	6.905	7.04183		6.878	7.17867	7.02833
		W110	Zhongjing212	6.99633	6.72	6.85817		6.693	6.99633	6.84467
		W111	Zhongjing9677	6.8684	6.52107	6.69473		6.49407	6.8684	6.68123
		W112	Zhongjing131	7.217	6.93233	7.07467		6.90533	7.217	7.06117
		W113	Suwujing	7.49367	7.21733	7.3555		7.19033	7.49367	7.342
		W114	Zhognjing438	8.21993	7.9466	8.08327		7.9196	8.21993	8.06977
		W115	Yanjing9	8.28033	8.00367	8.142		7.97667	8.28033	8.1285
		W116	Yangfujing4901	7.66567	7.38567	7.52567		7.35867	7.66567	7.51217
		W117	Zijing	7.55333	7.28433	7.41883		7.25733	7.55333	7.40533
		W118	Zhendao10	7.791	7.51533	7.65317		7.48833	7.791	7.63967
		W119	Zhenghan2	7.22667	6.95333	7.09		6.92633	7.22667	7.0765
		W120	Zhen6	7.45323	7.1779	7.31557		7.1509	7.45323	7.30207
		W121	Xishihuang	7.61	7.33367	7.47183		7.30667	7.61	7.45833
		W122	Daliangdao	7.28767	7.01333	7.1505		6.98633	7.28767	7.137
		W123	Heizuidao	7.48033	7.21067	7.3455		7.18367	7.48033	7.332
		W124	Xiaohuangdao	7.69167	7.42333	7.5575		7.39633	7.69167	7.544
		W125	Fenghaungdao	7.604	7.33033	7.46717		7.30333	7.604	7.45367
		W126	Maijieqing	7.566	7.31267	7.43933		7.28567	7.566	7.42583
		W127	Jijingdao	7.6619	7.3849	7.5234		7.3579	7.6619	7.5099
		W128	Zhognsuyangzhogndao	7.45433	7.182	7.31817		7.155	7.45433	7.30467
		W129	Duiguzhong	7.20467	6.92323	7.06395		6.89623	7.20467	7.05045
		W130	Shuaishaban	8.08867	7.818	7.95333		7.791	8.08867	7.93983
		W131	Niumaohuang	7.63867	7.359	7.49883		7.332	7.63867	7.48533
		W132	Wanheitouhong	7.51333	7.24067	7.377		7.21367	7.51333	7.3635
		W133	Taihuqing	7.196	6.90867	7.05233		6.88167	7.196	7.03883
		W134	Yilimang	7.42267	7.135	7.27883		7.108	7.42267	7.26533
		W135	Wuqitou	8.11033	7.83527	7.9728		7.80827	8.11033	7.9593
		W136	Jiaoaiheitouhong	7.411	7.13433	7.27267		7.10733	7.411	7.25917
		W137	Laowusi	7.34433	7.06467	7.2045		7.03767	7.34433	7.191
		W138	Manliuzhong	7.31467	7.04467	7.17967		7.01767	7.31467	7.16617
		W139	Tainluohuang	7.56267	7.28833	7.4255		7.26133	7.56267	7.412
		W140	Jiucaiqing	7.71367	7.43333	7.5735		7.40633	7.71367	7.56
		W141	Aiqidaliuzhong	8.169	7.87967	8.02433		7.85267	8.169	8.01083
		W142	Lujingqing	7.908	7.63767	7.77283		7.61067	7.908	7.75933
		W143	Gaoliangqing	7.611	7.336	7.4735		7.309	7.611	7.46
		W144	Yishixing	7.15833	6.85867	7.0085		6.83167	7.15833	6.995
		W145	Heizhong	7.62333	7.33967	7.4815		7.31267	7.62333	7.468
		W146	Louhanbai	6.7496	6.47227	6.61093		6.44527	6.7496	6.59743
		W147	Xueliqing	7.21813	6.94647	7.0823		6.91947	7.21813	7.0688
		W148	Liyangxiaohongdao	7.25333	6.977	7.11517		6.95	7.25333	7.10167
		W149	Juhuahuang	7.62867	7.345	7.48683		7.318	7.62867	7.47333
		W150	Changzijingyedao	7.24933	6.97	7.10967		6.943	7.24933	7.09617
		W151	Gaidaoqing	7.45967	7.18633	7.323		7.15933	7.45967	7.3095
		W152	Dingzhuangdao	7.32823	7.0509	7.18957		7.0239	7.32823	7.17607
		W153	Xuetangzhong	6.653	6.37333	6.51317		6.34633	6.653	6.49967
		W154	Guanbaidan	7.26733	6.98467	7.126		6.95767	7.26733	7.1125
		W155	Hongbaodao	7.57933	7.31133	7.44533		7.28433	7.57933	7.43183
		W156	Tiegandao	7.38567	7.108	7.24683		7.081	7.38567	7.23333
		W157	Juzigaung	8.46033	8.19	8.32517		8.163	8.46033	8.31167
		W158	Yebaidao	7.1272	6.84353	6.98537		6.81653	7.1272	6.97187
		W159	Daheitouhong	7.1779	6.89257	7.03523		6.86557	7.1779	7.02173
		W160	Baigedao	7.218	6.93333	7.07567		6.90633	7.218	7.06217
		W161	Diediezhong	7.62667	7.35367	7.49017		7.32667	7.62667	7.47667
		W162	Puxidadaotou	7.6048	7.32213	7.46347		7.29513	7.6048	7.44997
		W163	Yangdao	7.141	6.86533	7.00317		6.83833	7.141	6.98967
		W164	Yanhongdao	7.215	6.93233	7.07367		6.90533	7.215	7.06017
		W165	Baikewandao	7.00367	6.71233	6.858		6.68533	7.00367	6.8445
		W166	Aiguodadaotou	7.68667	7.404	7.54533		7.377	7.68667	7.53183
		W167	Sishitou	7.37967	7.10633	7.243		7.07933	7.37967	7.2295
		W168	Jiuxiaozhong	6.974	6.688	6.831		6.661	6.974	6.8175
		W169	Chushuhuang	6.96767	6.694	6.83083		6.667	6.96767	6.81733
		W170	Qianjindao	7.33333	7.05033	7.19183		7.02333	7.33333	7.17833
		W171	Qijiangqing	7.383	7.10967	7.24633		7.08267	7.383	7.23283
		W172	Baishuqing	8.1776	7.90527	8.04143		7.87827	8.1776	8.02793
		W173	Feilaifeng	7.2513	7.43567	7.34348		7.38933	7.448	7.41867
		W174	Kejia6	7.27997	7.49033	7.38515		7.444	7.47667	7.46033
		W175	Lamujia	6.44897	6.665	6.55698		6.61867	6.64567	6.63217
		W176	Haonuopie	8.6578	8.87517	8.76648		8.82883	8.8545	8.84167
		W177	Xiganggu	7.6503	7.85933	7.75482		7.813	7.847	7.83
		W178	Shuangchengnuo	7.13263	7.34667	7.23965		7.30033	7.32933	7.31483
		W179	Qiutiandaxiedao	6.89663	7.11133	7.00398		7.065	7.09333	7.07917
		W180	Qiyunuo10	6.91413	7.1265	7.02032		7.08017	7.11083	7.0955
		W181	Wunuo1	6.9163	7.13067	7.02348		7.08433	7.113	7.09867
		W182	Jianongnuo2	6.62297	6.83167	6.72732		6.78533	6.81967	6.8025
		W183	Hongnong5	7.0293	7.23433	7.13182		7.188	7.226	7.207
		W184	Nonglinnuo4	8.26763	8.476	8.37182		8.42967	8.46433	8.447
		W185	Xiangnuodao	7.25397	7.46633	7.36015		7.42	7.45067	7.43533
		W186	Luchaihong	7.43397	7.64733	7.54065		7.601	7.63067	7.61583
		W187	Cungu	8.99263	9.211	9.10182		9.16467	9.18933	9.177
		W188	Katena	9.3812	9.58257	9.48188		9.53623	9.5779	9.55707
		W189	Guanchanuo	7.34097	7.554	7.44748		7.50767	7.53767	7.52267
		W190	Kuihuanuo	7.83703	8.0514	7.94422		8.00507	8.03373	8.0194
		W191	Suyunuo	6.94363	7.14733	7.04548		7.101	7.14033	7.12067
		W192	Hongjiaozhan	7.97497	8.16867	8.07182		8.12233	8.17167	8.147
		W193	Haobuka	9.2493	9.463	9.35615		9.41667	9.446	9.43133
		W194	Chuyanghan32	7.3883	7.60033	7.49432		7.554	7.585	7.5695
		W195	Libanyi	7.83753	8.04823	7.94288		8.0019	8.03423	8.01807
		W196	Kunnong8	7.61997	7.82733	7.72365		7.781	7.81667	7.79883
		W197	Guihuahuang	7.08063	7.295	7.18782		7.24867	7.27733	7.263
		W198	Zhoujiazhong	7.08497	7.29167	7.18832		7.24533	7.28167	7.2635
		W199	Xiaofenghuang	7.90113	8.10483	8.00298		8.0585	8.09783	8.07817
		W200	Xiangjingdao	6.63563	6.82367	6.72965		6.77733	6.83233	6.80483
		W201	Huizao	6.86163	7.06767	6.96465		7.02133	7.05833	7.03983
		W202	Yingtoudao	7.02363	7.23233	7.12798		7.186	7.22033	7.20317
		W203	Changdaotou	6.9113	7.11833	7.01482		7.072	7.108	7.09
		W204	Yangmiaozhong	7.5024	7.7181	7.61025		7.67177	7.6991	7.68543
		W205	Maoguangdao	7.41797	7.63133	7.52465		7.585	7.61467	7.59983
		W206	Dazhongdao	7.3933	7.601	7.49715		7.55467	7.59	7.57233
		W207	Sanxiadao	7.4042	7.62357	7.51388		7.57723	7.6009	7.58907
		W208	Xiaoqingmang	6.99463	7.20867	7.10165		7.16233	7.19133	7.17683
		W209	Hongganlizhihong	7.6023	7.81733	7.70982		7.771	7.799	7.785
		W210	Wuxidao	7.39797	7.61133	7.50465		7.565	7.59467	7.57983
		W211	Wanzhognqiu	7.0502	7.2619	7.15605		7.21557	7.2469	7.23123
		W212	Fengjingdao	7.1233	7.33367	7.22848		7.28733	7.32	7.30367
		W213	Liuzhong	7.6533	7.86867	7.76098		7.82233	7.85	7.83617
		W214	Cuganlizhihong	7.40163	7.618	7.50982		7.57167	7.59833	7.585
		W215	Chiguwandao	7.28963	7.50367	7.39665		7.45733	7.48633	7.47183
		W216	Jiaobaiyeqing	7.9743	8.15167	8.06298		8.10533	8.171	8.13817
		W217	Chiguhong	7.6093	7.82533	7.71732		7.779	7.806	7.7925
		W218	Fanluoqing	7.4353	7.65167	7.54348		7.60533	7.632	7.61867
		W219	Zaoyedao	7.81013	8.01063	7.91038		7.9643	8.00683	7.98557
		W220	Baidiegu	7.08963	7.29233	7.19098		7.246	7.28633	7.26617
		W221	Wangjiadao	7.11637	7.3274	7.22188		7.28107	7.31307	7.29707
		W222	Jiangyinzhong	7.22963	7.44023	7.33493		7.3939	7.42633	7.41012
		W223	Eyingbaijingdao	7.0942	7.2689	7.18155		7.22257	7.2909	7.25673
		W224	Tiekewanguangtou	7.14063	7.3459	7.24327		7.29957	7.33733	7.31845
		W225	Tiekedao	6.85047	7.0615	6.95598		7.01517	7.04717	7.03117
		W226	Dadaosuitou	6.8818	7.09383	6.98782		7.0475	7.0785	7.063
		W227	Aibaidao	7.11397	7.33533	7.22465		7.289	7.31067	7.29983
		W228	Xiepihuang	7.17797	7.39733	7.28765		7.351	7.37467	7.36283
		W229	Xiaobaidao	7.90597	8.11433	8.01015		8.068	8.10267	8.08533
		W230	Baishidao	7.16963	7.391	7.28032		7.34467	7.36633	7.3555
		W231	Manbaidao	7.0223	7.23967	7.13098		7.19333	7.219	7.20617
		W232	Guangtouluhuabai	7.60243	7.81813	7.71028		7.7718	7.79913	7.78547
		W233	Hongmangjing	7.33697	7.545	7.44098		7.49867	7.53367	7.51617
		W234	Wumangyedao	7.33427	7.54497	7.43962		7.49863	7.53097	7.5148
		W235	Luhuabai	7.83663	8.04657	7.9416		8.00023	8.03333	8.01678
		W236	Haidongqing	6.84763	7.06333	6.95548		7.017	7.04433	7.03067
		W237	Shenlenuo	6.9783	7.19533	7.08682		7.149	7.175	7.162
		W238	Xiangqing	7.69497	7.9	7.79748		7.85367	7.89167	7.87267
		W239	Jinghui418	8.3877	8.60173	8.49472		8.5554	8.5844	8.5699
		W240	Malaihong	8.15063	8.36933	8.25998		8.323	8.34733	8.33517
		W241	Jingnuo330	6.92097	7.13533	7.02815		7.089	7.11767	7.10333
		W242	Zaijinjing	7.43533	7.6537	7.54452		7.60737	7.63203	7.6197
		W243	Fuyu3	8.80063	9.03333	8.91698		8.987	8.99733	8.99217
		W244	Dongnongjing424	7.53563	7.751	7.64332		7.70467	7.73233	7.7185
		W245	Dongnongjingnuo418	7.31097	7.52867	7.41982		7.48233	7.50767	7.495
		W246	R254	7.36663	7.577	7.47182		7.53067	7.56333	7.547
		W247	Jiangyinnuo	6.91297	7.13167	7.02232		7.08533	7.10967	7.0975
		W248	Jinggunuo	6.9203	7.132	7.02615		7.08567	7.117	7.10133
		W249	Shanhonggu	7.8083	8.027	7.91765		7.98067	8.005	7.99283
		W250	Wanshengmaohuang	7.31797	7.53367	7.42582		7.48733	7.51467	7.501
		W251	Wanyangdao	7.5743	7.79367	7.68398		7.74733	7.771	7.75917
		W252	Aidazhong	7.3163	7.53533	7.42582		7.489	7.513	7.501
		W253	Jijiaohong	7.20423	7.41727	7.31075		7.37093	7.40093	7.38593
		W254	Toulaizhong	7.25497	7.46867	7.36182		7.42233	7.45167	7.437
		W255	Huakenuo	6.86797	7.087	6.97748		7.04067	7.06467	7.05267
		W256	Toudengyishixing	6.83163	7.04433	6.93798		6.998	7.02833	7.01317
		W257	Maozitou	9.6663	9.88467	9.77548		9.83833	9.863	9.85067
		W258	Zaonuodao	7.20463	7.419	7.31182		7.37267	7.40133	7.387
		W259	Datougui	7.4012	7.61923	7.51022		7.5729	7.5979	7.5854
		W260	Zaoxiaobaidao	7.4119	7.6266	7.51925		7.58027	7.6086	7.59443
		W261	Kangzhounuo	7.41297	7.62633	7.51965		7.58	7.60967	7.59483
		W262	Kuobanzhong	7.01957	7.2346	7.12708		7.18827	7.21627	7.20227
		W263	Yangzhongdao	7.3848	7.59883	7.49182		7.5525	7.5815	7.567
		W264	Huangkewanguangtou	7.52563	7.744	7.63482		7.69767	7.72233	7.71
		W265	Tiehanyishixing	7.31887	7.53223	7.42555		7.4859	7.51557	7.50073
		W266	Aijiaoluganhuang	7.49497	7.71367	7.60432		7.66733	7.69167	7.6795
		W267	Zhonghua3	7.62497	7.84033	7.73265		7.794	7.82167	7.80783
		W268	Buxienuo	9.05557	9.26793	9.16175		9.2216	9.25227	9.23693
		W269	Wanjingnuo	6.85677	7.06453	6.96065		7.0182	7.05347	7.03583
		W270	C418	8.0292	8.2409	8.13505		8.19457	8.2259	8.21023
		W271	Fuxiang1	8.12457	8.34193	8.23325		8.2956	8.32127	8.30843
		W272	Yuedao1	7.58597	7.79977	7.69287		7.75343	7.78267	7.76805
		W273	Yuedao2	8.31697	8.53133	8.42415		8.485	8.51367	8.49933
		W274	Yuedao3	9.8642	10.0771	9.97063		10.0307	10.0609	10.0458
		W275	Yuedao4	7.88297	8.09767	7.99032		8.05133	8.07967	8.0655
		W276	Yuedao5	7.96363	8.173	8.06832		8.12667	8.16033	8.1435
		W277	Yuedao6	8.8853	9.10067	8.99298		9.05433	9.082	9.06817
		W278	Yuedao7	7.4943	7.712	7.60315		7.66567	7.691	7.67833
		W279	Yuedao8	8.52597	8.73833	8.63215		8.692	8.72267	8.70733
		W280	Yuedao9	10.3703	10.582	10.4762		10.5357	10.567	10.5513
		W281	Yuedao10	10.3743	10.5913	10.4828		10.545	10.571	10.558
		W282	Yuedao11	7.6023	7.83033	7.71632		7.784	7.799	7.7915
		W283	Yuedao12	9.4253	9.63933	9.53232		9.593	9.622	9.6075
		W284	Yuedao13	10.395	10.6097	10.5023		10.5633	10.5917	10.5775
		W285	Yuedao14	7.63497	7.842	7.73848		7.79567	7.83167	7.81367
		W286	Yuedao15	7.83017	8.04853	7.93935		8.0022	8.02687	8.01453
		W287	Yuedao16	7.6513	7.86367	7.75748		7.81733	7.848	7.83267
		W288	Yuedao17	8.57897	8.798	8.68848		8.75167	8.77567	8.76367
		W289	Yuedao18	8.40597	8.61767	8.51182		8.57133	8.60267	8.587
		W290	Yuedao19	9.1903	9.40567	9.29798		9.35933	9.387	9.37317
		W291	Yuedao20	8.4963	8.711	8.60365		8.66467	8.693	8.67883
		W292	Yuedao21	10.3466	10.5557	10.4512		10.5093	10.5433	10.5263
		W293	Yuedao22	8.8153	9.02767	8.92148		8.98133	9.012	8.99667
		W294	Yuedao23	8.74063	8.95033	8.84548		8.904	8.93733	8.92067
		W295	Yuedao24	9.27863	9.493	9.38582		9.44667	9.47533	9.461
		W296	Yuedao25	8.39363	8.598	8.49582		8.55167	8.59033	8.571
		W297	Yuedao26	8.35763	8.56367	8.46065		8.51733	8.55433	8.53583
		W298	Yuedao27	8.77823	9.0286	8.90342		8.98227	8.97493	8.9786
		W299	Yuedao28	8.76757	8.98027	8.87392		8.93393	8.96427	8.9491
		W300	Yuedao29	7.9683	8.18	8.07415		8.13367	8.165	8.14933
		W301	Yuedao30	8.19997	8.42067	8.31032		8.37433	8.39667	8.3855
		W302	Yuedao31	8.80663	9.024	8.91532		8.97767	9.00333	8.9905
		W303	Yuedao32	11.0915	11.3068	11.1992		11.2605	11.2882	11.2743
		W304	Yuedao33	8.23063	8.44133	8.33598		8.395	8.42733	8.41117
		W305	Yuedao34	8.94493	9.16063	9.05278		9.1143	9.14163	9.12797
		W306	Yuedao35	9.1216	9.33197	9.22678		9.28563	9.3183	9.30197
		W307	Yuedao36	9.6144	9.8381	9.72625		9.79177	9.8111	9.80143
		W308	Yuedao37	10.6023	10.8207	10.7115		10.7743	10.799	10.7867
		W309	Yuedao38	9.1006	9.30863	9.20462		9.2623	9.2973	9.2798
		W310	Yuedao39	11.1276	11.3413	11.2345		11.295	11.3243	11.3097
		W311	Yuedao40	10.4023	10.6183	10.5103		10.572	10.599	10.5855
		W312	Yuedao41	11.3268	11.5355	11.4311		11.4891	11.5235	11.5063
		W313	Yuedao42	10.8336	11.051	10.9423		11.0047	11.0303	11.0175
		W314	Yuedao43	8.45167	8.67703	8.56435		8.6307	8.64837	8.63953
		W315	Yuedao44	8.48097	8.698	8.58948		8.65167	8.67767	8.66467
		W316	Yuedao45	8.93423	9.14827	9.04125		9.10193	9.13093	9.11643
		W317	Yuedao46	10.076	10.298	10.187		10.2517	10.2727	10.2622
		W318	Yuedao47	8.4483	8.656	8.55215		8.60967	8.645	8.62733
		W319	Yuedao48	8.3173	8.53067	8.42398		8.48433	8.514	8.49917
		W320	Yuedao49	10.1693	10.3813	10.2753		10.335	10.366	10.3505
		W321	Yuedao50	9.5773	9.79367	9.68548		9.74733	9.774	9.76067
		W322	Yuedao51	10.5376	10.7513	10.6445		10.705	10.7343	10.7197
		W323	Yuedao52	8.11263	8.33633	8.22448		8.29	8.30933	8.29967
		W324	Yuedao53	9.62097	9.83133	9.72615		9.785	9.81767	9.80133
		W325	Yuedao54	8.9753	9.18433	9.07982		9.138	9.172	9.155
		W326	Yuedao55	9.4233	9.63433	9.52882		9.588	9.62	9.604
		W327	Yuedao56	9.31613	9.5245	9.42032		9.47817	9.51283	9.4955
		W328	Yuedao57	10.4076	10.324	10.3658		10.2777	10.6043	10.441
		W329	Yuedao58	8.56497	8.769	8.66698		8.72267	8.76167	8.74217
		W330	Yuedao59	8.31137	8.5174	8.41438		8.47107	8.50807	8.48957
		W331	Yuedao60	10.541	10.7527	10.6469		10.7064	10.7377	10.7221
		W332	Yuedao61	10.8157	11.0304	10.923		10.9841	11.0124	10.9982
		W333	Yuedao62	12.016	12.2183	12.1172		12.172	12.2127	12.1923
		W334	Yuedao63	7.91697	8.12633	8.02165		8.08	8.11367	8.09683
		W335	Yuedao64	8.53963	8.75767	8.64865		8.71133	8.73633	8.72383
		W336	Yuedao65	8.37763	8.573	8.47532		8.52667	8.57433	8.5505
		W337	Yuedao66	8.61097	8.821	8.71598		8.77467	8.80767	8.79117
		W338	Yuedao67	9.2933	9.50367	9.39848		9.45733	9.49	9.47367
		W339	Yuedao68	9.17697	9.419	9.29798		9.37267	9.37367	9.37317
		W340	Yuedao69	9.40163	9.59367	9.49765		9.54733	9.59833	9.57283
		W341	Yuedao70	9.85963	10.066	9.96282		10.0197	10.0563	10.038
		W342	Yuedao71	8.4983	8.69467	8.59648		8.64833	8.695	8.67167
		W343	Yuedao72	10.1597	10.3924	10.276		10.346	10.3564	10.3512
		W344	Yuedao73	7.90553	8.1129	8.00922		8.06657	8.10223	8.0844
		W345	Yuedao74	7.91727	8.12497	8.02112		8.07863	8.11397	8.0963
		W346	Yuedao75	8.51697	8.723	8.61998		8.67667	8.71367	8.69517
		W347	Yuedao76	8.62563	8.83467	8.73015		8.78833	8.82233	8.80533
		W348	Yuedao77	7.87163	8.07567	7.97365		8.02933	8.06833	8.04883
		W349	Yuedao78	7.89363	8.06233	7.97798		8.016	8.09033	8.05317
		W350	Yuedao79	8.6103	8.818	8.71415		8.77167	8.807	8.78933
		W351	Yuedao80	8.45263	8.65733	8.55498		8.611	8.64933	8.63017
		W352	Yuedao81	8.50663	8.716	8.61132		8.66967	8.70333	8.6865
		W353	Yuedao82	8.5633	8.77667	8.66998		8.73033	8.76	8.74517
		W354	Yuedao83	9.03363	9.24333	9.13848		9.197	9.23033	9.21367
		W355	Yuedao84	10.1276	10.342	10.2348		10.2957	10.3243	10.31
		W356	Yuedao85	9.4193	9.62367	9.52148		9.57733	9.616	9.59667
		W357	Yuedao86	9.01497	9.225	9.11998		9.17867	9.21167	9.19517
		W358	Yuedao87	8.81197	9.02633	8.91915		8.98	9.00867	8.99433
		W359	Yuedao88	10.3046	10.5187	10.4116		10.4723	10.5013	10.4868
		W360	Yuedao89	10.0863	10.302	10.1942		10.2557	10.283	10.2693
		W361	Yuedao90	9.80697	10.0233	9.91515		9.977	10.0037	9.99033
		W362	Yuedao91	9.3193	9.529	9.42415		9.48267	9.516	9.49933
		W363	Yuedao92	8.5483	8.75767	8.65298		8.71133	8.745	8.72817
		W364	Yuedao93	7.7273	7.94267	7.83498		7.89633	7.924	7.91017
		W365	Yuedao94	8.64697	8.85567	8.75132		8.80933	8.84367	8.8265
		W366	Yuedao95	8.3683	8.58167	8.47498		8.53533	8.565	8.55017
		W367	Yuedao96	8.3353	8.542	8.43865		8.49567	8.532	8.51383
		W368	Yuedao97	8.50797	8.71667	8.61232		8.67033	8.70467	8.6875
		W369	Yuedao98	8.80597	9.03033	8.91815		8.984	9.00267	8.99333
		W370	Yuedao99	8.43063	8.64267	8.53665		8.59633	8.62733	8.61183
		W371	Yuedao100	10.024	10.2317	10.1278		10.1853	10.2207	10.203
		W372	Yuedao101	8.68347	8.8935	8.78848		8.84717	8.88017	8.86367
		W373	Yuedao102	7.67837	7.89753	7.78795		7.8512	7.87507	7.86313
		W374	Yuedao103	7.89263	8.104	7.99832		8.05767	8.08933	8.0735
		W375	Yuedao104	9.51097	9.721	9.61598		9.67467	9.70767	9.69117
		W376	Yuedao105	9.8643	10.0803	9.97228		10.0339	10.061	10.0475
		W377	Yuedao106	8.15423	8.3396	8.24692		8.29327	8.35093	8.3221
		W378	Yuedao107	9.3871	9.59347	9.49028		9.54713	9.5838	9.56547
		W379	Yuedao108	9.00963	9.22333	9.11648		9.177	9.20633	9.19167
		W380	Yuedao109	8.99163	9.20133	9.09648		9.155	9.18833	9.17167
		W381	Yuedao110	7.46227	7.67163	7.56695		7.6253	7.65897	7.64213
		W382	Yuedao111	8.3883	8.59467	8.49148		8.54833	8.585	8.56667
		W383	Yuedao112	6.86097	7.05533	6.95815		7.009	7.05767	7.03333
		W384	Yuedao113	9.83433	10.058	9.94618		10.0117	10.031	10.0214
		W385	Yuedao114	7.76563	7.98167	7.87365		7.93533	7.96233	7.94883
		W386	Yuedao115	10.0063	10.196	10.1012		10.1497	10.203	10.1763
		W387	Yuedao116	9.5313	9.742	9.63665		9.69567	9.728	9.71183
		W388	Yuedao117	9.33897	9.538	9.43848		9.49167	9.53567	9.51367
		W389	Yuedao118	9.4883	9.69633	9.59232		9.65	9.685	9.6675
		W390	Yuedao119	6.88817	7.0982	6.99318		7.05187	7.08487	7.06837
		W391	Yuedao120	6.61197	6.814	6.71298		6.76767	6.80867	6.78817
		W392	Yuedao121	8.54907	8.7631	8.65608		8.71677	8.74577	8.73127
		W393	Jia45	7.1453	7.36167	7.25348		7.31533	7.342	7.32867
		W394	Nannongjing3786	7.31163	7.53067	7.42115		7.48433	7.50833	7.49633
		W395	24248	7.12563	7.33967	7.23265		7.29333	7.32233	7.30783
		W396	Nannongjing4004	7.3223	7.53933	7.43082		7.493	7.519	7.506
		W397	Nannongjing4016	6.49203	6.71007	6.60105		6.66373	6.68873	6.67623
		W398	Zijianwujing	6.92963	7.14133	7.03548		7.095	7.12633	7.11067
		W399	Ningjing2	7.61677	7.8358	7.72628		7.78947	7.81347	7.80147
		W400	Wuxiang99-8	7.1233	7.33257	7.22793		7.28623	7.32	7.30312
		W401	Wuyujing8	7.1156	7.32463	7.22012		7.2783	7.3123	7.2953
		W402	Nannongjing002	7.54277	7.74707	7.64492		7.70073	7.73947	7.7201
		W403	Nannongjing004	7.1743	7.38933	7.28182		7.343	7.371	7.357
		W404	Huaidao5hao	6.87897	7.07533	6.97715		7.029	7.07567	7.05233
		W405	Zhongzuo93	7.31463	7.53333	7.42398		7.487	7.51133	7.49917
		W406	Yandao9	6.83163	7.043	6.93732		6.99667	7.02833	7.0125
		W407	Lianjing4	6.63097	6.845	6.73798		6.79867	6.82767	6.81317
		W408	Jindao1007	6.6743	6.89767	6.78598		6.85133	6.871	6.86117
		W409	Huajing5	6.82687	7.03823	6.93255		6.9919	7.02357	7.00773
		W410	Huajing6	6.9203	7.131	7.02565		7.08467	7.117	7.10083
		W411	Yangfujing7	6.57573	6.78577	6.68075		6.73943	6.77243	6.75593
		W412	Yangfujing8	6.96763	7.18	7.07382		7.13367	7.16433	7.149
		W413	Zhendao99	6.90297	7.10413	7.00355		7.0578	7.09967	7.07873
		W414	Nanjing42	6.87997	7.07767	6.97882		7.03133	7.07667	7.054
		W415	Lianjing9823	6.76563	6.97	6.86782		6.92367	6.96233	6.943
		W416	Huifeng1	6.63097	6.84467	6.73782		6.79833	6.82767	6.813
		W417	Huifeng2	7.10063	7.31467	7.20765		7.26833	7.29733	7.28283
		W418	Yandao8	6.8363	7.03233	6.93432		6.986	7.033	7.0095
		W419	Wuyujing21	7.10497	7.32133	7.21315		7.275	7.30167	7.28833
		W420	Shashani	8.3263	8.54033	8.43332		8.494	8.523	8.5085
		W421	Muzhan4	6.64093	6.85663	6.74878		6.8103	6.83763	6.82397
		W422	Mudanjiang29	6.6021	6.81813	6.71012		6.7718	6.7988	6.7853
		W423	Mudanjiang28	7.1193	7.333	7.22615		7.28667	7.316	7.30133
		W424	Mudanjiang27	8.56263	8.768	8.66532		8.72167	8.75933	8.7405
		W425	Kenzhan2	7.50863	7.72233	7.61548		7.676	7.70533	7.69067
		W426	Heijing8	6.96363	7.168	7.06582		7.12167	7.16033	7.141
		W427	Hejing1	6.60523	6.81793	6.71158		6.7716	6.80193	6.78677
		W428	Beidao4	8.4913	8.701	8.59615		8.65467	8.688	8.67133
		W429	Beidao3	8.85007	9.0561	8.95308		9.00977	9.04677	9.02827
		W430	Suijing12	8.88363	9.09133	8.98748		9.045	9.08033	9.06267
		W431	Songjing12	8.83697	9.04867	8.94282		9.00233	9.03367	9.018
		W432	Songjing11	7.97297	8.17967	8.07632		8.13333	8.16967	8.1515
		W433	Songjing10	7.67763	7.89033	7.78398		7.844	7.87433	7.85917
		W434	Dongnong430	6.99763	7.21233	7.10498		7.166	7.19433	7.18017
		W435	Dongnong424	7.81043	8.02747	7.91895		7.98113	8.00713	7.99413
		W436	Longnuo3	7.12063	7.29733	7.20898		7.251	7.31733	7.28417
		W437	Longjing28	7.0923	7.30833	7.20032		7.262	7.289	7.2755
		W438	Longjing27	6.82097	7.02767	6.92432		6.98133	7.01767	6.9995
		W439	Longjing26	7.25563	7.467	7.36132		7.42067	7.45233	7.4365
		W440	Longjing25	6.5954	6.80343	6.69942		6.7571	6.7921	6.7746
		W441	Longjing24	6.6383	6.81	6.72415		6.76367	6.835	6.79933
		W442	Longjing22	6.9243	7.13033	7.02732		7.084	7.121	7.1025
		W443	Longjing21	7.6363	7.853	7.74465		7.80667	7.833	7.81983
		W444	Longjing20	7.2498	7.45707	7.35343		7.41073	7.4465	7.42862
		W445	Longjing19	7.7884	7.9951	7.89175		7.94877	7.9851	7.96693
		W446	Longjing18	7.86497	8.07433	7.96965		8.028	8.06167	8.04483
		W447	Longjing17	6.41597	6.62167	6.51882		6.57533	6.61267	6.594
		W448	Longjing16	7.70007	7.91477	7.80742		7.86843	7.89677	7.8826
		W449	Longjing15	7.29473	7.5101	7.40242		7.46377	7.49143	7.4776
		W450	Zhonglongdao1	7.36353	7.57857	7.47105		7.53223	7.56023	7.54623
		W451	Zongdao8	7.3333	7.574	7.45365		7.52767	7.53	7.52883
		W452	Longdao6	6.58797	6.80493	6.69645		6.7586	6.78467	6.77163
		W453	Longdao5	6.8213	7.029	6.92515		6.98267	7.018	7.00033
		W454	Longdao4	6.6426	6.84997	6.74628		6.80363	6.8393	6.82147
		W455	Kendao19	7.1163	7.33067	7.22348		7.28433	7.313	7.29867
		W456	Kendao18	8.03197	8.239	8.13548		8.19267	8.22867	8.21067
		W457	Kendao12	7.92963	8.13933	8.03448		8.093	8.12633	8.10967
		W458	Kendao13	7.23563	7.442	7.33882		7.39567	7.43233	7.414
		W459	Kendao20	7.3833	7.58867	7.48598		7.54233	7.58	7.56117
		W460	Longdun106	7.94797	8.191	8.06948		8.14467	8.14467	8.14467
		W461	Longdun105	7.23463	7.43	7.33232		7.38367	7.43133	7.4075
		W462	Sanjiang2	11.8586	12.069	11.9638		12.0227	12.0553	12.039
		W463	Nongxiang21	11.892	12.1003	11.9962		12.054	12.0887	12.0713
		W464	Nongxiang25	12.0056	12.2007	12.1031		12.1543	12.2023	12.1783
		W465	Nongxiang26	12.2923	12.4923	12.3923		12.446	12.489	12.4675
		W466	Yuzhenxiang	12.4403	12.621	12.5307		12.5747	12.637	12.6058
		W467	Xiangwanxian17	12.1076	12.317	12.2123		12.2707	12.3043	12.2875
		W468	Huanghuazhan	11.1656	11.2903	11.228		11.244	11.3623	11.3032
		W469	Fengyouwan8	11.9983	12.1937	12.096		12.1473	12.195	12.1712
		W470	Ribenqing	6.9663	7.17367	7.06998		7.12733	7.163	7.14517
		W471	Tijin	6.9113	7.135	7.02315		7.08867	7.108	7.09833
		W472	M1004	7.39963	7.618	7.50882		7.57167	7.59633	7.584
		W473	Zhongguo91	7.21353	7.42857	7.32105		7.38223	7.41023	7.39623
		W474	Qiutainxiaoding	7.0035	7.21653	7.11002		7.1702	7.2002	7.1852
		W475	Cai	7.53047	7.73883	7.63465		7.6925	7.72717	7.70983
		W476	Qiuguang	7.11363	7.32667	7.22015		7.28033	7.31033	7.29533
		W477	Kangbingyueguang	7.0953	7.305	7.20015		7.25867	7.292	7.27533
		W478	Youzhiyueguang	7.08397	7.29267	7.18832		7.24633	7.28067	7.2635
		W479	Kasala	7.68627	7.89597	7.79112		7.84963	7.88297	7.8663
		W480	Xiangchuanwuxinbaimi	7.4262	7.63257	7.52938		7.58623	7.6229	7.60457
		W481	Dongzheng1640	6.8599	7.02193	6.94092		6.9756	7.0566	7.0161
		W482	Dongzhengwuyujing21	7.40463	7.60867	7.50665		7.56233	7.60133	7.58183
		W483	Heimixiandao	9.43797	9.63767	9.53782		9.59133	9.63467	9.613
		W484	Heimijingdao	7.3623	7.57433	7.46832		7.528	7.559	7.5435
		W485	Zidao	6.59463	6.8	6.69732		6.75367	6.79133	6.7725
		W486	9311	9.88823	10.1229	10.0056		10.0766	10.0849	10.0808
		W487	Zacaodao	6.82463	7.038	6.93132		6.99167	7.02133	7.0065
		W488	Youmang429	6.71063	6.92333	6.81698		6.877	6.90733	6.89217
		W489	Wanqu429	6.6994	6.92177	6.81058		6.87543	6.8961	6.88577
		W490	Zhili429	6.76017	6.98287	6.87152		6.93653	6.95687	6.9467
		W491	Si4029	6.7123	6.92167	6.81698		6.87533	6.909	6.89217
		W492	Si4031	6.86863	7.05433	6.96148		7.008	7.06533	7.03667
		W493	Si4033	7.4143	7.62667	7.52048		7.58033	7.611	7.59567
		W494	Si4039	7.50443	7.71213	7.60828		7.6658	7.70113	7.68347
		W495	Si4040	6.91063	7.12233	7.01648		7.076	7.10733	7.09167
		W496	Si4041	6.3943	6.60733	6.50082		6.561	6.591	6.576
		W497	Si4049	6.4073	6.61867	6.51298		6.57233	6.604	6.58817
		W498	Si4079	6.92143	7.1278	7.02462		7.08147	7.11813	7.0998
		W499	Si4081	7.8949	8.10693	8.00092		8.0606	8.0916	8.0761
		W500	Si4082	6.9883	7.20267	7.09548		7.15633	7.185	7.17067
		W501	Si4139	6.59363	6.814	6.70382		6.76767	6.79033	6.779
		W502	Si4152	7.389	7.60603	7.49752		7.5597	7.5857	7.5727
		W503	Si4161	7.33497	7.547	7.44098		7.50067	7.53167	7.51617
		W504	Si4229	7.16717	6.77383	6.9705		6.74683	7.16717	6.957
		W505	Si4230	7.05167	6.658	6.85483		6.631	7.05167	6.84133
		W506	Si4251	7.02743	6.63943	6.83343		6.61243	7.02743	6.81993
		W507	Si4252	7.56467	7.17667	7.37067		7.14967	7.56467	7.35717
		W508	Si4259	7.25357	6.8609	7.05723		6.8339	7.25357	7.04373
		W509	Si4263	7.4942	7.10247	7.29833		7.07547	7.4942	7.28483
		W510	Si4280	7.12723	6.73723	6.93223		6.71023	7.12723	6.91873
		W511	Si4330	9.03013	8.63913	8.83463		8.61213	9.03013	8.82113
		W512	Si4360	8.11747	7.71847	7.91797		7.69147	8.11747	7.90447
		W513	Si4364	7.5548	7.1628	7.3588		7.1358	7.5548	7.3453
		W514	Digudao	7.56827	7.17627	7.37227		7.14927	7.56827	7.35877
		W515	Si4385	7.174	6.776	6.975		6.749	7.174	6.9615
		W516	Si4386	10.5947	10.2017	10.3982		10.1747	10.5947	10.3847
		W517	Sihao4141	7.12467	6.73	6.92733		6.703	7.12467	6.91383
		W518	Ningjinghui096	7.666	7.27767	7.47183		7.25067	7.666	7.45833
		W519	Ningjinghui117	7.30267	6.91433	7.1085		6.88733	7.30267	7.095
		W520	Ningjinghui145	8.07433	7.68333	7.87883		7.65633	8.07433	7.86533
		W521	Ningjinghui166	7.577	7.18633	7.38167		7.15933	7.577	7.36817
		W522	Ningjinghui208	7.33933	6.952	7.14567		6.925	7.33933	7.13217
		W523	Ningjinghui210	7.5658	7.17737	7.37158		7.15037	7.5658	7.35808
		W524	Ningjinghui237	8.10567	7.72033	7.913		7.69333	8.10567	7.8995
		W525	Ningjinghui246	7.598	7.21467	7.40633		7.18767	7.598	7.39283
		W526	Ningjinghui260	8.06467	7.66567	7.86517		7.63867	8.06467	7.85167
		W527	Ningjinghui285	7.97843	7.56977	7.7741		7.54277	7.97843	7.7606
		W528	Ningjinghui286	7.54	7.15067	7.34533		7.12367	7.54	7.33183
		W529	Ningjinghui290	7.4	7.033	7.2165		7.006	7.4	7.203
		W530	Ningjinghui292	7.24633	6.857	7.05167		6.83	7.24633	7.03817
		W531	Ningjinghui293	8.32067	7.92833	8.1245		7.90133	8.32067	8.111
		W532	Ningjinghui296	7.381	6.99467	7.18783		6.96767	7.381	7.17433
		W533	Ningjinghui298	7.56567	7.18	7.37283		7.153	7.56567	7.35933
		W534	Ningjinghui338	7.24023	6.8529	7.04657		6.8259	7.24023	7.03307
		W535	Hongyin1009	7.38923	7.0019	7.19557		6.9749	7.38923	7.18207
		W536	Hongyin1010	7.52106	7.12572	7.32339		7.09872	7.52106	7.30989
		W537	Hongyin1011	7.41567	7.01833	7.217		6.99133	7.41567	7.2035
		W538	Hongyin1012	7.236	6.832	7.034		6.805	7.236	7.0205
		W539	Cai1	7.37423	6.96923	7.17173		6.94223	7.37423	7.15823
		W540	Nannongjing1R	7.871	7.481	7.676		7.454	7.871	7.6625
		W541	Nannongjing2R	7.08933	6.692	6.89067		6.665	7.08933	6.87717
		W542	Nannongjing3R	7.473	7.07767	7.27533		7.05067	7.473	7.26183
		W543	Ningjing1R-34	7.41867	7.02567	7.22217		6.99867	7.41867	7.20867
		W544	Ningjing1R-38	7.56867	7.177	7.37283		7.15	7.56867	7.35933
		W545	Ningjing1R-39	7.52967	7.13733	7.3335		7.11033	7.52967	7.32
		W546	Ningjing1R-43	7.56413	7.1698	7.36697		7.1428	7.56413	7.35347
		W547	Ningjing1R-45	7.71533	7.328	7.52167		7.301	7.71533	7.50817
		W548	Ningjing1R-97	7.59433	7.2	7.39717		7.173	7.59433	7.38367
		W549	Ningjing1R-99	7.97633	7.583	7.77967		7.556	7.97633	7.76617
		W550	Ningjing1R-108	7.761	7.36767	7.56433		7.34067	7.761	7.55083
		W551	Ningjing1R-122	7.72917	7.33383	7.5315		7.30683	7.72917	7.518
		W552	Ningjing1R-125	7.5311	7.13877	7.33493		7.11177	7.5311	7.32143
		W553	Ningjing1R-126	7.604	7.209	7.4065		7.182	7.604	7.393
		W554	Ningjing1R-128	7.85767	7.46467	7.66117		7.43767	7.85767	7.64767
		W555	Ningjing1R-129	7.45433	7.05733	7.25583		7.03033	7.45433	7.24233
		W556	Ningjing1R-130	7.64467	7.24833	7.4465		7.22133	7.64467	7.433
		W557	Ningjing1R-132	7.30857	6.9119	7.11023		6.8849	7.30857	7.09673
		W558	Ningjing1R-133	7.60223	7.20523	7.40373		7.17823	7.60223	7.39023
		W559	Ningjing1R-35	7.55193	7.16127	7.3566		7.13427	7.55193	7.3431
		W560	Ningjing1R-36	7.36833	6.97823	7.17328		6.95123	7.36833	7.15978
		W561	Ningjing1R-37	7.26767	6.87767	7.07267		6.85067	7.26767	7.05917
		W562	Ningjing1R-40	7.56233	7.171	7.36667		7.144	7.56233	7.35317
		W563	Ningjing1R-41	7.5718	7.17047	7.37113		7.14347	7.5718	7.35763
		W564	Ningjing1R-42	7.77133	7.37533	7.57333		7.34833	7.77133	7.55983
		W565	Ningjing1R-44	7.46167	7.06867	7.26517		7.04167	7.46167	7.25167
		W566	Ningjing1R-47	7.86567	7.48067	7.67317		7.45367	7.86567	7.65967
		W567	Ningjing1R-50	7.7168	7.3268	7.5218		7.2998	7.7168	7.5083
		W568	Ningjing1R-53	8.02167	7.62	7.82083		7.593	8.02167	7.80733
		W569	Ningjing1R-56	7.60533	7.20433	7.40483		7.17733	7.60533	7.39133
		W570	Ningjing1R-104	7.20067	6.802	7.00133		6.775	7.20067	6.98783
		W571	Ningjing1R-107	7.467	7.073	7.27		7.046	7.467	7.2565
		W572	Ningjing1R-111	7.36967	6.97133	7.1705		6.94433	7.36967	7.157
		W573	Ningjing1R-114	7.29	6.896	7.093		6.869	7.29	7.0795
		W574	Ningjing1R-115	7.8345	7.43917	7.63683		7.41217	7.8345	7.62333
		W575	Ningjing1R-117	7.28633	6.89583	7.09108		6.86883	7.28633	7.07758
		W576	Ningjing1R-123	7.32167	6.92833	7.125		6.90133	7.32167	7.1115
		W577	Ningjing1R-127	7.185	6.78533	6.98517		6.75833	7.185	6.97167
		W578	Ningjing1R-131	7.3069	6.9239	7.1154		6.8969	7.3069	7.1019
		W579	Ningjing1R-21	7.65613	7.2534	7.45477		7.2264	7.65613	7.44127
		W580	Ningjing1R-26	7.36333	6.967	7.16517		6.94	7.36333	7.15167
		W581	Ningjing1R-30	7.7407	7.34737	7.54403		7.32037	7.7407	7.53053
		W582	Ningjing1R-68	7.53157	7.13723	7.3344		7.11023	7.53157	7.3209
		W583	Ningjing1R-70	7.47363	7.07763	7.27563		7.05063	7.47363	7.26213
		W584	Ningjing1R-118	8.533	8.13533	8.33417		8.10833	8.533	8.32067
		W585	Ningjing1R-137	7.21833	6.82667	7.0225		6.79967	7.21833	7.009
		W586	Ningjing1R-143	7.137	6.733	6.935		6.706	7.137	6.9215
		W587	Ningjing1R-134	7.7701	7.3731	7.5716		7.3461	7.7701	7.5581
		W588	Ningjing1R-135	7.267	6.87733	7.07217		6.85033	7.267	7.05867
		W589	Ningjing1R-136	7.72553	7.3362	7.53087		7.3092	7.72553	7.51737
		W590	Ningjing1R-138	7.26067	6.86633	7.0635		6.83933	7.26067	7.05
		W591	Ningjing1R-139	7.56033	7.17067	7.3655		7.14367	7.56033	7.352
		W592	Ningjing1R-140	7.55413	7.16747	7.3608		7.14047	7.55413	7.3473
		W593	Ningjing1R-141	7.871	7.477	7.674		7.45	7.871	7.6605
		W594	Ningjing1R-142	7.70887	7.30387	7.50637		7.27687	7.70887	7.49287
		W595	Ningjing1R-144	7.85947	7.46347	7.66147		7.43647	7.85947	7.64797
		W596	Ningjing1R-18	6.98033	6.58267	6.7815		6.55567	6.98033	6.768
		W597	Ningjing1R-59	7.87533	7.47933	7.67733		7.45233	7.87533	7.66383
		W598	Ningjing1R-60	7.07453	6.66687	6.8707		6.63987	7.07453	6.8572
		W599	Ningjing1R-61	7.475	7.08367	7.27933		7.05667	7.475	7.26583
		W600	Ningjing1R-62	7.27267	6.88633	7.0795		6.85933	7.27267	7.066
		W601	Ningjing1R-63	7.65013	7.2638	7.45697		7.2368	7.65013	7.44347
		W602	Ningjing1R-100	7.632	7.24433	7.43817		7.21733	7.632	7.42467
		W603	Ningjing1R-102	7.29733	6.908	7.10267		6.881	7.29733	7.08917
		W604	Ningjing1R-124	8.087	7.68967	7.88833		7.66267	8.087	7.87483
		W605	Ningjing1R-55	7.87677	7.4873	7.68203		7.4603	7.87677	7.66853
		W606	Ningjing1R-101	7.489	7.10033	7.29467		7.07333	7.489	7.28117
		W607	Ningjing1R-109	7.35333	6.96333	7.15833		6.93633	7.35333	7.14483
		W608	Ningjing1R-110	7.4186	7.0256	7.2221		6.9986	7.4186	7.2086
		W609	Ningjing1R-112	7.2652	6.86253	7.06387		6.83553	7.2652	7.05037
		W610	Ningjing1R-116	7.5436	7.1486	7.3461		7.1216	7.5436	7.3326
		W611	Ningjing1R-149	7.57247	7.19247	7.38247		7.16547	7.57247	7.36897
		W612	Ningjing1R-13	7.53467	7.15633	7.3455		7.12933	7.53467	7.332
		W613	Ningjing1R-15	8.02123	7.63023	7.82573		7.60323	8.02123	7.81223
		W614	Ningjing1R-17	7.402	7.023	7.2125		6.996	7.402	7.199
		W615	Ningjing1R-22	7.26933	6.88433	7.07683		6.85733	7.26933	7.06333
		W616	Ningjing1R-24	7.59467	7.20733	7.401		7.18033	7.59467	7.3875
		W617	Ningjing1R-27	7.75333	7.36567	7.5595		7.33867	7.75333	7.546
		W618	Ningjing1R-28	7.58267	7.19467	7.38867		7.16767	7.58267	7.37517
		W619	Ningjing1R-31	7.59733	7.20633	7.40183		7.17933	7.59733	7.38833
		W620	Ningjing1R-32	7.3993	7.00497	7.20213		6.97797	7.3993	7.18863
		W621	Ningjing1R-33	7.20067	6.807	7.00383		6.78	7.20067	6.99033
		W622	Ningjing1R-69	7.59773	7.20973	7.40373		7.18273	7.59773	7.39023
		W623	Ningjing1R-46	7.04253	6.64353	6.84303		6.61653	7.04253	6.82953
		W624	Ningjing1R-48	7.273	6.883	7.078		6.856	7.273	7.0645
		W625	Ningjing1R-49	8.02647	7.6268	7.82663		7.5998	8.02647	7.81313
		W626	Ningjing1R-52	7.0382	6.64887	6.84353		6.62187	7.0382	6.83003
		W627	Ningjing1R-54	7.24333	6.86333	7.05333		6.83633	7.24333	7.03983
		W628	Ningjing1R-57	7.9802	7.5792	7.7797		7.5522	7.9802	7.7662
