# Supplementary material for: Genetic Diversity and Elite Allele Mining for Grain Traits in Rice (Oryza sativa L.) by Association Mapping
Source: Front Plant Sci. 2016 Jun 7;7:787. doi: 10.3389/fpls.2016.00787 (PMC4896222; doi:10.3389/fpls.2016.00787)
Supplement: Supplementary file 11 [file Table11.XLSX]

## Sheet: S11-GLGW
		Supplementary Table S11 Raw data of grain length to grain width ratio of 628 accessions
			2013 GL/GW				2014 GL/GW
	Code	Accessions	Replication 1	Replication 2	Average		Replication 1	Replication 2	Average
	W1	Yazihuang	2.38554	2.16732	2.27643		2.19111	2.25476	2.22293
	W2	Hongmangzaodao	3.25183	2.97074	3.11129		3.00401	3.05288	3.02844
	W3	Wanhuangdao	2.79613	2.55196	2.67404		2.57454	2.64026	2.6074
	W4	Guozinuo	2.16572	1.97633	2.07103		1.99141	2.06046	2.02593
	W5	Shuijingbaidao	2.07793	1.91244	1.99519		1.92695	1.98193	1.95444
	W6	Wumangzaodao	2.65723	2.45394	2.55558		2.46957	2.53636	2.50297
	W7	Sanbailitou	1.90929	1.75661	1.83295		1.76449	1.82826	1.79638
	W8	Cuyingwanyangdao	2.15231	1.98182	2.06707		1.9944	2.05344	2.02392
	W9	Yanglingdao	2.07957	1.9036	1.99158		1.91508	1.97998	1.94753
	W10	Wanyedao	3.78245	3.41592	3.59919		3.45209	3.52919	3.49064
	W11	Qiaobinghuang	3.56046	3.20394	3.3822		3.23453	3.31853	3.27653
	W12	Tiejingqing	2.35307	2.16906	2.26106		2.18086	2.24669	2.21377
	W13	Xiaobaiyedao	2.79867	2.56045	2.67956		2.58124	2.64911	2.61518
	W14	Baoxintaihuqing	2.89731	2.67252	2.78491		2.67014	2.76435	2.71725
	W15	Jiangfeng4	2.3254	2.1254	2.2254		2.13995	2.20762	2.17378
	W16	Sujing4	2.2721	2.07639	2.17424		2.10455	2.15091	2.12773
	W17	Aizhongluohanhuang	2.08912	1.93164	2.01038		1.9421	1.99886	1.97048
	W18	Baodao	2.32556	2.13062	2.22809		2.14509	2.21037	2.17773
	W19	Wanmuxiqiu	2.40734	2.20299	2.30516		2.21886	2.2862	2.25253
	W20	Huangsanshi	2.9173	2.6802	2.79875		2.69709	2.76711	2.7321
	W21	Erheidao	2.25595	2.07948	2.16771		2.09465	2.15149	2.12307
	W22	Xiaoqingzhong	2.35885	2.17074	2.2648		2.1878	2.24599	2.21689
	W23	Zaoguangtou	2.18837	2.0105	2.09944		2.02455	2.08394	2.05425
	W24	Xiaoluohanhuang	2.24643	2.05836	2.15239		2.07184	2.1397	2.10577
	W25	Souzhouqing	2.78316	2.54165	2.6624		2.55926	2.63273	2.59599
	W26	Wanluli	2.5372	2.34317	2.44018		2.33175	2.43319	2.38247
	W27	Wanbaguo	2.248	2.06747	2.15774		2.07997	2.14429	2.11213
	W28	Ebusinuodao	2.10527	1.93093	2.0181		1.93978	2.01006	1.97492
	W29	Laodiegu	2.29283	2.09918	2.19601		2.1142	2.17941	2.14681
	W30	Yefenghuang	2.05227	1.88165	1.96696		1.89341	1.95769	1.92555
	W31	Chenjiazhong	2.36745	2.17389	2.27067		2.18454	2.25558	2.22006
	W32	Zaoheitouhong	2.39558	2.18531	2.29045		2.20276	2.26629	2.23452
	W33	Luohanhuang	2.54486	2.33187	2.43837		2.35143	2.41506	2.38324
	W34	Longgouzhong	2.32941	2.14557	2.23749		2.16048	2.22135	2.19091
	W35	Shiluqing	2.31512	2.11733	2.21622		2.12749	2.2036	2.16555
	W36	Ligengqing	2.15546	1.96793	2.0617		1.98436	2.04853	2.01645
	W37	Heitouhong	2.25239	2.06507	2.15873		2.08225	2.14245	2.11235
	W38	Laolaihong	2.23209	2.045	2.13854		2.0628	2.12281	2.0928
	W39	Erlibie	2.25895	2.07432	2.16664		2.08916	2.15101	2.12008
	W40	Jinguhuang	2.15123	1.97697	2.0641		1.98858	2.05211	2.02034
	W41	Cuganhuangdao	1.9684	1.80333	1.88586		1.8136	1.88098	1.84729
	W42	Zaoshirihuangdao	2.00445	1.83632	1.92039		1.84582	1.91601	1.88092
	W43	Shengtangqing	2.32975	2.1334	2.23158		2.14812	2.21408	2.1811
	W44	Xiaomandao	2.2634	2.08225	2.17283		2.09171	2.16069	2.1262
	W45	Shengtangdao	3.23928	2.92941	3.08434		2.95758	3.03388	2.99573
	W46	Wanmandao	2.46738	2.25372	2.36055		2.27234	2.33889	2.30562
	W47	Nantouzhong	2.13524	1.95288	2.04406		1.96658	2.03362	2.0001
	W48	Daniaodao	2.31275	2.12433	2.21854		2.13867	2.20419	2.17143
	W49	Kongqueqing	2.24433	2.05118	2.14775		2.06777	2.13204	2.09991
	W50	Kaiqing	2.42363	2.22745	2.32554		2.24502	2.30622	2.27562
	W51	Manyedao	2.30138	2.10838	2.20488		2.12167	2.19197	2.15682
	W52	Baikenuo	2.95279	2.70258	2.82769		2.71265	2.79984	2.75624
	W53	Baimangnuo	2.37241	2.17617	2.27429		2.19287	2.25701	2.22494
	W54	Xiangzhunuo	2.13138	1.9495	2.04044		1.96336	2.02971	1.99654
	W55	Yaxienuo	2.01649	1.85272	1.9346		1.86334	1.92681	1.89507
	W56	Xianhui429	2.94292	2.68647	2.8147		2.69675	2.78542	2.74109
	W57	Zijianxian3	2.90287	2.65056	2.77671		2.67214	2.74415	2.70814
	W58	Huangsandannuo	2.74172	2.49068	2.6162		2.50396	2.59025	2.54711
	W59	Jia159	2.3039	2.09869	2.2013		2.11238	2.18557	2.14898
	W60	Sidao10	2.36693	2.16451	2.26572		2.18388	2.24638	2.21513
	W61	Wuqiang	2.30426	2.10688	2.20557		2.12211	2.18941	2.15576
	W62	Wuyujing3	2.29402	2.09085	2.19243		2.10625	2.17703	2.14164
	W63	Xiushui04	2.10924	1.91472	2.01198		1.92721	2.00635	1.96678
	W64	Zhendao88	2.31191	2.10956	2.21074		2.12984	2.19183	2.16084
	W65	Zhendao6	2.29325	2.09629	2.19477		2.11371	2.1778	2.14576
	W66	Taijing9	2.43985	2.23664	2.33825		2.25286	2.31864	2.28575
	W67	Taijing16xuanAC	2.39422	2.19052	2.29237		2.20821	2.2746	2.2414
	W68	Taijing16xuanzi	2.28244	2.08888	2.18566		2.10543	2.1704	2.13791
	W69	Diantun502xuanzao	2.30934	2.11293	2.21113		2.13129	2.19282	2.16206
	W70	Hongdao35	3.63604	3.34767	3.49186		3.36985	3.44173	3.40579
	W71	Hongdao37	2.26247	2.0723	2.16739		2.08371	2.15406	2.11889
	W72	Zijianjingnuo	2.40826	2.20065	2.30445		2.21151	2.28815	2.24983
	W73	Nannongjing62401	2.77448	2.51518	2.64483		2.52733	2.6175	2.57241
	W74	Tongjing109	4.28462	3.94341	4.11402		3.92641	4.05921	3.99281
	W75	Yangdao6	4.07359	3.70786	3.89073		3.75015	3.81401	3.78208
	W76	Nignjing1	3.19614	2.89816	3.04715		2.92261	2.99878	2.96069
	W77	Wujing15	2.50246	2.29007	2.39627		2.30878	2.37451	2.34164
	W78	Wuxiangjing14	2.74058	2.52554	2.63306		2.54189	2.60551	2.5737
	W79	Xudao3	2.71176	2.49573	2.60374		2.49403	2.58625	2.54014
	W80	Nannongjing003	2.41927	2.21829	2.31878		2.23611	2.30093	2.26852
	W81	Nannongjing005	2.27925	2.07352	2.17638		2.08985	2.16017	2.12501
	W82	5jing20	2.35347	2.14726	2.25037		2.16454	2.23139	2.19796
	W83	5jing15	2.56367	2.34945	2.45656		2.36789	2.43366	2.40078
	W84	molingjing	2.28745	2.09865	2.19305		2.11422	2.17675	2.14548
	W85	5jing03	2.36843	2.16717	2.2678		2.18912	2.24819	2.21866
	W86	5jing68	2.43401	2.21799	2.326		2.23878	2.30774	2.27326
	W87	Xudao4	2.23604	2.04679	2.14142		2.0631	2.12683	2.09496
	W88	Xudao5	2.39151	2.18316	2.28734		2.19898	2.26838	2.23368
	W89	Huaidao9	2.51741	2.31345	2.41543		2.33114	2.39068	2.36091
	W90	Yandao6	2.50268	2.30153	2.4021		2.30792	2.38728	2.3476
	W91	Yangguang200	2.32727	2.12513	2.2262		2.14145	2.20881	2.17513
	W92	Lianjing2	2.41357	2.20146	2.30752		2.21838	2.28997	2.25417
	W93	Xiushui79	2.3856	2.18368	2.28464		2.19291	2.26915	2.23103
	W94	Cbao	2.19493	2.00523	2.10008		2.01766	2.08917	2.05342
	W95	Nipponbare	2.3662	2.15765	2.26193		2.17508	2.24325	2.20917
	W96	Zhen9424	2.14761	1.96236	2.05499		1.9764	2.04375	2.01007
	W97	Wuyujing7	2.52476	2.31157	2.41816		2.32686	2.39694	2.3619
	W98	Yanjing8	2.33735	2.13571	2.23653		2.14936	2.22253	2.18595
	W99	Zhengdao18	2.37455	2.16935	2.27195		2.18372	2.25486	2.21929
	W100	Huaidao11	2.41763	2.2099	2.31376		2.23039	2.29116	2.26077
	W101	Shengdao808	2.32905	2.12496	2.22701		2.14363	2.20807	2.17585
	W102	Shengdao14	2.34123	2.13542	2.23832		2.15126	2.2209	2.18608
	W103	Yujing6	2.37581	2.16608	2.27094		2.18725	2.24842	2.21784
	W104	Huaidao8	2.42211	2.21168	2.3169		2.23404	2.29332	2.26368
	W105	Jindao12	2.37604	2.16972	2.27288		2.18739	2.25326	2.22033
	W106	Wandao68	2.16057	1.98436	2.07247		1.9996	2.05936	2.02948
	W107	Xudao2	2.43202	2.2183	2.32516		2.2367	2.3053	2.271
	W108	Sujing353	2.39244	2.19179	2.29211		2.21094	2.27402	2.24248
	W109	Xiangjing9407	2.3351	2.13163	2.23336		2.14632	2.21612	2.18122
	W110	Zhongjing212	2.35362	2.13854	2.24608		2.15702	2.22648	2.19175
	W111	Zhongjing9677	2.11384	1.91028	2.01206		1.92157	2.01203	1.9668
	W112	Zhongjing131	2.32945	2.11933	2.22439		2.13889	2.20636	2.17263
	W113	Suwujing	2.25402	2.06583	2.15993		2.0812	2.14493	2.11307
	W114	Zhognjing438	2.53369	2.32583	2.42976		2.34685	2.40583	2.37634
	W115	Yanjing9	2.54004	2.33547	2.43776		2.35284	2.4162	2.38452
	W116	Yangfujing4901	2.26756	2.07988	2.17372		2.09595	2.15873	2.12734
	W117	Zijing	2.30478	2.11181	2.20829		2.12977	2.1898	2.15978
	W118	Zhendao10	2.53703	2.32146	2.42924		2.33921	2.40661	2.37291
	W119	Zhenghan2	2.20629	2.01741	2.11185		2.03369	2.09671	2.0652
	W120	Zhen6	2.30044	2.10599	2.20321		2.12179	2.18677	2.15428
	W121	Xishihuang	2.17297	1.99853	2.08575		2.01151	2.07383	2.04267
	W122	Daliangdao	2.08717	1.91461	2.00089		1.92888	1.9895	1.95919
	W123	Heizuidao	2.13892	1.96619	2.05255		1.9803	2.03972	2.01001
	W124	Xiaohuangdao	2.20776	2.03584	2.1218		2.04645	2.10942	2.07794
	W125	Fenghaungdao	2.19246	2.01734	2.1049		2.02952	2.09265	2.06108
	W126	Maijieqing	2.22972	2.05105	2.14038		2.0677	2.1221	2.0949
	W127	Jijingdao	2.39491	2.19506	2.29498		2.20987	2.27739	2.24363
	W128	Zhognsuyangzhogndao	2.38596	2.18675	2.28635		2.19845	2.26966	2.23406
	W129	Duiguzhong	2.12338	1.95107	2.03722		1.95731	2.03038	1.99384
	W130	Shuaishaban	2.43984	2.23563	2.33773		2.26117	2.31303	2.2871
	W131	Niumaohuang	2.1312	1.96067	2.04594		1.97387	2.03519	2.00453
	W132	Wanheitouhong	2.11728	1.94694	2.03211		1.96083	2.02026	1.99054
	W133	Taihuqing	2.35093	2.13957	2.24525		2.15643	2.22855	2.19249
	W134	Yilimang	2.23342	2.04293	2.13818		2.05805	2.1253	2.09167
	W135	Wuqitou	2.47928	2.27483	2.37705		2.2955	2.35469	2.32509
	W136	Jiaoaiheitouhong	2.3107	2.11283	2.21177		2.1295	2.19477	2.16213
	W137	Laowusi	2.3181	2.11855	2.21833		2.13356	2.20242	2.16799
	W138	Manliuzhong	2.22223	2.03309	2.12766		2.05081	2.11101	2.08091
	W139	Tainluohuang	2.28715	2.10099	2.19407		2.11276	2.18007	2.14642
	W140	Jiucaiqing	2.13759	1.9677	2.05265		1.98089	2.04191	2.0114
	W141	Aiqidaliuzhong	2.51773	2.30579	2.41176		2.32679	2.39046	2.35862
	W142	Lujingqing	2.39304	2.2	2.29652		2.21569	2.27787	2.24678
	W143	Gaoliangqing	2.44925	2.24212	2.34569		2.2574	2.32617	2.29179
	W144	Yishixing	2.09929	1.91745	2.00837		1.92974	2.00123	1.96549
	W145	Heizhong	2.29994	2.11376	2.20685		2.12276	2.19545	2.1591
	W146	Louhanbai	1.96826	1.79815	1.88321		1.81071	1.8752	1.84296
	W147	Xueliqing	2.32574	2.13409	2.22992		2.13967	2.21755	2.17861
	W148	Liyangxiaohongdao	2.19848	2.01086	2.10467		2.0265	2.0905	2.0585
	W149	Juhuahuang	2.32493	2.1294	2.22716		2.14506	2.21164	2.17835
	W150	Changzijingyedao	2.21179	2.02185	2.11682		2.03733	2.10288	2.07011
	W151	Gaidaoqing	2.21514	2.03195	2.12355		2.04676	2.10924	2.078
	W152	Dingzhuangdao	2.13947	1.9624	2.05094		1.97547	2.03959	2.00753
	W153	Xuetangzhong	2.11279	1.92199	2.01739		1.93531	2.00633	1.97082
	W154	Guanbaidan	2.36209	2.15195	2.25702		2.16955	2.23904	2.2043
	W155	Hongbaodao	2.18682	2.01507	2.10094		2.02555	2.08893	2.05724
	W156	Tiegandao	2.2202	2.03454	2.12737		2.04837	2.11402	2.08119
	W157	Juzigaung	2.95318	2.72012	2.83665		2.72543	2.8099	2.76766
	W158	Yebaidao	2.17497	1.98555	2.08026		2.00061	2.06785	2.03423
	W159	Daheitouhong	2.38449	2.16725	2.27587		2.1861	2.25696	2.22153
	W160	Baigedao	2.09162	1.92825	2.00993		1.92848	2.00742	1.96795
	W161	Diediezhong	2.19507	2.21037	2.20272		2.03249	2.29242	2.16246
	W162	Puxidadaotou	2.18884	2.19524	2.19204		2.0238	2.27998	2.15189
	W163	Yangdao	2.02484	2.02868	2.02676		1.86993	2.11014	1.99004
	W164	Yanhongdao	2.1152	2.12162	2.11841		1.94992	2.20813	2.07903
	W165	Baikewandao	2.07576	2.07654	2.07615		1.90773	2.16666	2.0372
	W166	Aiguodadaotou	2.46576	2.48974	2.47775		2.27148	2.5848	2.42814
	W167	Sishitou	2.13448	2.14727	2.14088		1.97324	2.22987	2.10155
	W168	Jiuxiaozhong	2.00574	2.00652	2.00613		1.84652	2.09233	1.96942
	W169	Chushuhuang	2.04789	2.05497	2.05143		1.88724	2.13898	2.01311
	W170	Qianjindao	2.27812	2.28996	2.28404		2.09693	2.38188	2.23941
	W171	Qijiangqing	2.15897	2.17279	2.16588		1.99512	2.25633	2.12572
	W172	Baishuqing	2.41154	2.43679	2.42417		2.2373	2.52073	2.37902
	W173	Feilaifeng	2.37616	2.55568	2.46592		2.32831	2.49231	2.41031
	W174	Kejia6	2.11032	2.2665	2.18841		2.08473	2.20285	2.14379
	W175	Lamujia	1.89377	2.04231	1.96804		1.87744	1.97611	1.92677
	W176	Haonuopie	2.15796	2.29384	2.2259		2.13603	2.23766	2.18685
	W177	Xiganggu	2.31009	2.48153	2.39581		2.27552	2.41553	2.34552
	W178	Shuangchengnuo	2.23756	2.4155	2.32653		2.20605	2.34513	2.27559
	W179	Qiutiandaxiedao	2.00832	2.16163	2.08498		1.98756	2.09637	2.04197
	W180	Qiyunuo10	2.21109	2.39267	2.30188		2.17954	2.32137	2.25046
	W181	Wunuo1	1.91358	2.12425	2.01891		1.96542	2.04636	2.00589
	W182	Jianongnuo2	1.88495	2.12931	2.00713		1.93667	2.04957	1.99312
	W183	Hongnong5	2.05475	2.31095	2.18285		2.10679	2.22907	2.16793
	W184	Nonglinnuo4	2.36128	2.64534	2.50331		2.41308	2.56191	2.4875
	W185	Xiangnuodao	2.03668	2.28903	2.16285		2.08872	2.20834	2.14853
	W186	Luchaihong	2.14421	2.41587	2.28004		2.19796	2.33152	2.26474
	W187	Cungu	3.41969	3.97919	3.69944		3.49246	3.84662	3.66954
	W188	Katena	3.67799	4.2676	3.97279		3.74635	4.13554	3.94095
	W189	Guanchanuo	2.80797	3.34377	3.07587		2.87913	3.21671	3.04792
	W190	Kuihuanuo	2.50217	2.84647	2.67432		2.56199	2.74833	2.65516
	W191	Suyunuo	2.19481	2.50304	2.34892		2.25066	2.41227	2.33146
	W192	Hongjiaozhan	3.03192	3.51725	3.27459		3.0953	3.40016	3.24773
	W193	Haobuka	2.94295	3.32776	3.13535		3.00235	3.2265	3.11443
	W194	Chuyanghan32	2.22405	2.5252	2.37463		2.27975	2.43613	2.35794
	W195	Libanyi	2.56699	2.95132	2.75916		2.62716	2.85001	2.73858
	W196	Kunnong8	2.13724	2.39261	2.26493		2.18783	2.31296	2.25039
	W197	Guihuahuang	2.03857	2.29707	2.16782		2.09251	2.21353	2.15302
	W198	Zhoujiazhong	2.05401	2.31228	2.18314		2.10611	2.23046	2.16828
	W199	Xiaofenghuang	2.47374	2.79948	2.63661		2.52906	2.7076	2.61833
	W200	Xiangjingdao	2.00029	2.2619	2.13109		2.04883	2.18292	2.11588
	W201	Huizao	1.92005	2.1582	2.03913		1.97015	2.08067	2.02541
	W202	Yingtoudao	2.00561	2.26615	2.13588		2.05749	2.18501	2.12125
	W203	Changdaotou	2.00735	2.26209	2.13472		2.05964	2.18036	2.12
	W204	Yangmiaozhong	2.16145	2.428	2.29473		2.21582	2.34318	2.2795
	W205	Maoguangdao	2.08663	2.34681	2.21672		2.13905	2.26517	2.20211
	W206	Dazhongdao	2.02519	2.26639	2.14579		2.07469	2.18944	2.13206
	W207	Sanxiadao	2.06264	2.315	2.18882		2.11623	2.23278	2.17451
	W208	Xiaoqingmang	1.91739	2.15713	2.03726		1.96866	2.07877	2.02371
	W209	Hongganlizhihong	2.27682	2.58642	2.43162		2.33313	2.49627	2.4147
	W210	Wuxidao	2.22607	2.51965	2.37286		2.28215	2.4305	2.35632
	W211	Wanzhognqiu	1.93705	2.17197	2.05451		1.98779	2.09424	2.04102
	W212	Fengjingdao	1.99812	2.24286	2.12049		2.04956	2.1633	2.10643
	W213	Liuzhong	2.18375	2.44815	2.31595		2.23749	2.36422	2.30086
	W214	Cuganlizhihong	2.09579	2.35599	2.22589		2.14941	2.2729	2.21116
	W215	Chiguwandao	2.21345	2.50585	2.35965		2.27024	2.41581	2.34303
	W216	Jiaobaiyeqing	3.32493	3.88831	3.60662		3.38763	3.76241	3.57502
	W217	Chiguhong	2.6533	3.05162	2.85246		2.71921	2.94098	2.8301
	W218	Fanluoqing	2.06632	2.3179	2.19211		2.11894	2.23676	2.17785
	W219	Zaoyedao	2.21921	2.48897	2.35409		2.26851	2.40944	2.33898
	W220	Baidiegu	2.06976	2.33097	2.20037		2.12106	2.24963	2.18534
	W221	Wangjiadao	2.00914	2.25844	2.13379		2.0611	2.17795	2.11952
	W222	Jiangyinzhong	2.02738	2.27521	2.1513		2.07887	2.19537	2.13712
	W223	Eyingbaijingdao	1.95954	2.18474	2.07214		2.00034	2.11759	2.05896
	W224	Tiekewanguangtou	1.98021	2.22685	2.10353		2.02965	2.14963	2.08964
	W225	Tiekedao	2.07758	2.35374	2.21566		2.13339	2.26602	2.1997
	W226	Dadaosuitou	1.9597	2.19796	2.07883		2.01239	2.11717	2.06478
	W227	Aibaidao	2.01891	2.27915	2.14903		2.07407	2.19468	2.13437
	W228	Xiepihuang	2.00166	2.25108	2.12637		2.05531	2.16914	2.11222
	W229	Xiaobaidao	2.14552	2.39409	2.2698		2.19474	2.31688	2.25581
	W230	Baishidao	2.16387	2.45023	2.30705		2.22254	2.35885	2.29069
	W231	Manbaidao	2.08666	2.36092	2.22379		2.14323	2.27298	2.2081
	W232	Guangtouluhuabai	2.12279	2.3881	2.25545		2.17548	2.306	2.24074
	W233	Hongmangjing	2.01417	2.25777	2.13597		2.06387	2.18051	2.12219
	W234	Wumangyedao	2.09053	2.34963	2.22008		2.14289	2.26777	2.20533
	W235	Luhuabai	2.04434	2.27682	2.16058		2.09206	2.20308	2.14757
	W236	Haidongqing	2.07861	2.35775	2.21818		2.13589	2.26833	2.20211
	W237	Shenlenuo	2.02172	2.28511	2.15341		2.07677	2.20011	2.13844
	W238	Xiangqing	2.18049	2.43994	2.31022		2.23094	2.35984	2.29539
	W239	Jinghui418	2.65588	3.0101	2.83299		2.7151	2.91176	2.81343
	W240	Malaihong	3.21566	3.7523	3.48398		3.29129	3.61693	3.45411
	W241	Jingnuo330	2.14271	2.43267	2.28769		2.20072	2.34122	2.27097
	W242	Zaijinjing	2.09741	2.35321	2.22531		2.1514	2.27001	2.2107
	W243	Fuyu3	3.52542	4.10272	3.81407		3.60782	3.9557	3.78176
	W244	Dongnongjing424	2.52112	2.88916	2.70514		2.58414	2.78499	2.68457
	W245	Dongnongjingnuo418	2.27543	2.59688	2.43616		2.33479	2.50193	2.41836
	W246	R254	2.23164	2.52781	2.37972		2.28719	2.43891	2.36305
	W247	Jiangyinnuo	2.17571	2.50516	2.34044		2.23605	2.40887	2.32246
	W248	Jinggunuo	1.96395	2.20888	2.08641		2.01637	2.12814	2.07225
	W249	Shanhonggu	2.22016	2.4925	2.35633		2.27467	2.40739	2.34103
	W250	Wanshengmaohuang	1.99981	2.24141	2.12061		2.05138	2.16243	2.1069
	W251	Wanyangdao	2.10183	2.35948	2.23066		2.15521	2.27721	2.21621
	W252	Aidazhong	1.94272	2.16857	2.05565		1.99372	2.09169	2.0427
	W253	Jijiaohong	2.32245	2.65048	2.48647		2.38242	2.55336	2.46789
	W254	Toulaizhong	2.17714	2.4621	2.31962		2.23317	2.37364	2.30341
	W255	Huakenuo	2.27145	2.6192	2.44533		2.33496	2.51685	2.4259
	W256	Toudengyishixing	2.24636	2.57501	2.41068		2.30742	2.47643	2.39192
	W257	Maozitou	3.71067	4.28813	3.9994		3.78413	4.15195	3.96804
	W258	Zaonuodao	2.0618	2.31859	2.1902		2.11542	2.23552	2.17547
	W259	Datougui	2.07142	2.32474	2.19808		2.12489	2.24247	2.18368
	W260	Zaoxiaobaidao	2.04956	2.29616	2.17286		2.10147	2.21617	2.15882
	W261	Kangzhounuo	2.07028	2.32313	2.1967		2.12232	2.24241	2.18237
	W262	Kuobanzhong	2.16297	2.45619	2.30958		2.22091	2.36471	2.29281
	W263	Yangzhongdao	2.06876	2.32846	2.19861		2.12116	2.24703	2.1841
	W264	Huangkewanguangtou	2.14202	2.40937	2.27569		2.19649	2.32478	2.26064
	W265	Tiehanyishixing	2.18931	2.49017	2.33974		2.24506	2.40136	2.32321
	W266	Aijiaoluganhuang	2.26388	2.56314	2.41351		2.32179	2.47157	2.39668
	W267	Zhonghua3	2.4092	2.74644	2.57782		2.46872	2.64964	2.55918
	W268	Buxienuo	3.16265	3.6249	3.39378		3.22739	3.51025	3.36882
	W269	Wanjingnuo	2.0926	2.36923	2.23091		2.14777	2.28194	2.21485
	W270	C418	2.55952	2.91804	2.73878		2.61839	2.8201	2.71925
	W271	Fuxiang1	2.94013	3.37987	3.16		3.00902	3.26139	3.13521
	W272	Yuedao1	2.65615	3.05021	2.85318		2.72156	2.94015	2.83085
	W273	Yuedao2	3.27784	3.80672	3.54228		3.35168	3.67336	3.51252
	W274	Yuedao3	3.69755	4.24615	3.97185		3.76722	4.11654	3.94188
	W275	Yuedao4	2.90741	3.35661	3.13201		2.97664	3.23674	3.10669
	W276	Yuedao5	3.29348	3.85315	3.57331		3.3689	3.71415	3.54153
	W277	Yuedao6	3.30595	3.82361	3.56478		3.37604	3.69738	3.53671
	W278	Yuedao7	2.75364	3.18232	2.96798		2.82371	3.0634	2.94355
	W279	Yuedao8	3.14402	3.62648	3.38525		3.21238	3.50488	3.35863
	W280	Yuedao9	4.04647	4.67144	4.35895		4.11854	4.53195	4.32524
	W281	Yuedao10	3.95719	4.55067	4.25393		4.02968	4.41378	4.22173
	W282	Yuedao11	3.21632	3.79906	3.50769		3.30137	3.6477	3.47454
	W283	Yuedao12	4.21638	4.97166	4.59402		4.30005	4.80425	4.55215
	W284	Yuedao13	4.03375	4.6274	4.33058		4.10658	4.48872	4.29765
	W285	Yuedao14	2.71433	3.12145	2.91789		2.77834	3.01146	2.8949
	W286	Yuedao15	2.70037	3.09227	2.89632		2.76636	2.98201	2.87419
	W287	Yuedao16	2.66348	3.05252	2.858		2.72801	2.94379	2.8359
	W288	Yuedao17	2.96679	3.39937	3.18308		3.0332	3.28553	3.15937
	W289	Yuedao18	3.70797	4.3727	4.04033		3.78944	4.21605	4.00275
	W290	Yuedao19	3.64502	4.2144	3.92971		3.70357	4.07588	3.88972
	W291	Yuedao20	3.81799	4.52804	4.17302		3.90234	4.36424	4.13329
	W292	Yuedao21	4.06069	4.70369	4.38219		4.13213	4.56375	4.34794
	W293	Yuedao22	2.91801	3.31722	3.11761		2.97937	3.21203	3.0957
	W294	Yuedao23	3.42162	3.98148	3.70155		3.49314	3.8488	3.67097
	W295	Yuedao24	3.29419	3.78088	3.53754		3.36071	3.66194	3.51133
	W296	Yuedao25	2.98692	3.45682	3.22187		3.05003	3.34372	3.19688
	W297	Yuedao26	3.20872	3.69051	3.44961		3.27745	3.56635	3.4219
	W298	Yuedao27	3.14519	3.62576	3.38548		3.22522	3.49294	3.35908
	W299	Yuedao28	3.09662	3.54374	3.32018		3.16221	3.42867	3.29544
	W300	Yuedao29	3.60774	4.29444	3.95109		3.69137	4.13336	3.91237
	W301	Yuedao30	3.16927	3.71261	3.44094		3.24414	3.579	3.41157
	W302	Yuedao31	3.1394	3.59189	3.36565		3.20726	3.47356	3.34041
	W303	Yuedao32	4.22532	4.88039	4.55285		4.29708	4.74035	4.51871
	W304	Yuedao33	2.94723	3.38494	3.16609		3.01301	3.27028	3.14164
	W305	Yuedao34	3.12505	3.59153	3.35829		3.19097	3.47561	3.33329
	W306	Yuedao35	3.40892	3.93269	3.67081		3.47745	3.80712	3.64228
	W307	Yuedao36	3.44191	3.95402	3.69797		3.51233	3.82871	3.67052
	W308	Yuedao37	3.96042	4.55571	4.25806		4.0319	4.42094	4.22642
	W309	Yuedao38	3.03185	3.45816	3.245		3.09216	3.35222	3.22219
	W310	Yuedao39	4.29417	4.95156	4.62287		4.36622	4.80994	4.58808
	W311	Yuedao40	3.94854	4.5698	4.25917		4.0203	4.43292	4.22661
	W312	Yuedao41	4.30294	4.97406	4.6385		4.37196	4.83609	4.60403
	W313	Yuedao42	4.07867	4.69432	4.38649		4.15034	4.55744	4.35389
	W314	Yuedao43	3.34631	3.90367	3.62499		3.42485	3.76332	3.59409
	W315	Yuedao44	3.23495	3.75704	3.49599		3.30744	3.62724	3.46734
	W316	Yuedao45	3.00526	3.4195	3.21238		3.06817	3.31102	3.1896
	W317	Yuedao46	4.17974	4.87182	4.52578		4.26065	4.71545	4.48805
	W318	Yuedao47	3.60936	4.23251	3.92093		3.68656	4.08499	3.88577
	W319	Yuedao48	3.52159	4.1339	3.82774		3.6005	3.98605	3.79328
	W320	Yuedao49	4.15656	4.82025	4.48841		4.23219	4.67189	4.45204
	W321	Yuedao50	4.1198	4.83919	4.4795		4.20126	4.67908	4.44017
	W322	Yuedao51	4.37549	5.0911	4.73329		4.45301	4.93612	4.69457
	W323	Yuedao52	3.12738	3.63367	3.38053		3.20321	3.50105	3.35213
	W324	Yuedao53	3.95344	4.5926	4.27302		4.02879	4.44653	4.23766
	W325	Yuedao54	3.77166	4.42095	4.09631		3.84816	4.273	4.06058
	W326	Yuedao55	3.93348	4.59115	4.26231		4.0103	4.44188	4.22609
	W327	Yuedao56	4.3724	5.19672	4.78456		4.45753	5.02001	4.73877
	W328	Yuedao57	4.86816	5.65072	5.25944		4.81641	5.62565	5.22103
	W329	Yuedao58	4.01734	4.81428	4.41581		4.10038	4.6436	4.37199
	W330	Yuedao59	3.47673	4.07072	3.77373		3.55163	3.92904	3.74033
	W331	Yuedao60	4.1101	4.7436	4.42685		4.18212	4.60347	4.3928
	W332	Yuedao61	4.12629	4.74843	4.43736		4.1979	4.61034	4.40412
	W333	Yuedao62	4.94817	5.73409	5.34113		5.02038	5.57887	5.29963
	W334	Yuedao63	2.88554	3.3344	3.10997		2.95201	3.2181	3.08506
	W335	Yuedao64	3.16909	3.65341	3.41125		3.23998	3.52858	3.38428
	W336	Yuedao65	3.25177	3.75769	3.50473		3.31712	3.63539	3.47625
	W337	Yuedao66	3.46146	4.03315	3.74731		3.53504	3.89613	3.71558
	W338	Yuedao67	3.77572	4.38808	4.0819		3.85022	4.24584	4.04803
	W339	Yuedao68	3.7864	4.4343	4.11035		3.87512	4.27406	4.07459
	W340	Yuedao69	3.84525	4.46261	4.15393		3.91275	4.32697	4.11986
	W341	Yuedao70	4.20047	4.92854	4.56451		4.27689	4.77372	4.5253
	W342	Yuedao71	2.91637	3.33454	3.12545		2.97449	3.23072	3.10261
	W343	Yuedao72	3.82854	4.41704	4.12279		3.90605	4.27631	4.09118
	W344	Yuedao73	2.79058	3.21806	3.00432		2.85425	3.10744	2.98084
	W345	Yuedao74	2.69591	3.10063	2.89827		2.75744	2.99507	2.87626
	W346	Yuedao75	2.9189	3.34045	3.12968		2.98026	3.23306	3.10666
	W347	Yuedao76	3.1144	3.57864	3.34652		3.18012	3.4617	3.32091
	W348	Yuedao77	2.53243	2.87275	2.70259		2.58938	2.77744	2.68341
	W349	Yuedao78	2.64798	3.01382	2.8309		2.69552	2.92559	2.81055
	W350	Yuedao79	3.18498	3.67132	3.42815		3.25182	3.55082	3.40132
	W351	Yuedao80	3.16144	3.6491	3.40527		3.2279	3.5286	3.37825
	W352	Yuedao81	3.54936	4.14892	3.84914		3.62545	4.00538	3.81542
	W353	Yuedao82	3.61524	4.23015	3.92269		3.69392	4.08204	3.88798
	W354	Yuedao83	3.61779	4.20383	3.91081		3.69096	4.06591	3.87844
	W355	Yuedao84	3.87339	4.45177	4.16258		3.94505	4.31673	4.13089
	W356	Yuedao85	4.02534	4.71797	4.37166		4.10114	4.56627	4.3337
	W357	Yuedao86	2.67798	2.80754	2.74276		2.73235	2.72454	2.72845
	W358	Yuedao87	2.93374	3.34723	3.14048		2.99612	3.24009	3.1181
	W359	Yuedao88	3.93297	4.55014	4.24155		4.00435	4.41362	4.20899
	W360	Yuedao89	4.01258	4.70599	4.35929		4.08765	4.55954	4.32359
	W361	Yuedao90	3.66524	4.21836	3.9418		3.73602	4.08771	3.91186
	W362	Yuedao91	3.63283	4.19757	3.9152		3.70405	4.064	3.88403
	W363	Yuedao92	3.30561	3.84368	3.57465		3.37613	3.71428	3.54521
	W364	Yuedao93	2.72088	3.12156	2.92122		2.78721	3.0097	2.89845
	W365	Yuedao94	3.07977	3.53643	3.3081		3.14449	3.42165	3.28307
	W366	Yuedao95	3.37568	3.93271	3.65419		3.45085	3.79492	3.62289
	W367	Yuedao96	3.66924	4.3343	4.00177		3.74835	4.18061	3.96448
	W368	Yuedao97	3.25685	3.75817	3.50751		3.3264	3.63216	3.47928
	W369	Yuedao98	3.53843	4.12509	3.83176		3.61773	3.98076	3.79925
	W370	Yuedao99	3.32089	3.86617	3.59353		3.39378	3.7329	3.56334
	W371	Yuedao100	4.51056	5.33421	4.92238		4.59187	5.16398	4.87792
	W372	Yuedao101	3.20743	3.68552	3.44648		3.27503	3.5645	3.41976
	W373	Yuedao102	3.13019	3.66341	3.3968		3.20853	3.52413	3.36633
	W374	Yuedao103	2.70574	3.09495	2.90034		2.76894	2.98797	2.87846
	W375	Yuedao104	3.28115	3.73675	3.50895		3.3443	3.62396	3.48413
	W376	Yuedao105	3.46047	3.96026	3.71036		3.52676	3.84069	3.68373
	W377	Yuedao106	3.16993	3.67029	3.42011		3.2315	3.55273	3.39212
	W378	Yuedao107	3.89474	4.54597	4.22035		3.96916	4.4002	4.18468
	W379	Yuedao108	3.46791	4.01226	3.74008		3.53977	3.88045	3.71011
	W380	Yuedao109	3.60386	4.22508	3.91447		3.67709	4.08562	3.88135
	W381	Yuedao110	3.17318	3.73233	3.45275		3.25073	3.59027	3.4205
	W382	Yuedao111	3.39241	3.97701	3.68471		3.46495	3.84062	3.65279
	W383	Yuedao112	2.37843	2.72324	2.55083		2.43645	2.6249	2.53067
	W384	Yuedao113	3.86215	4.47198	4.16707		3.9394	4.32824	4.13382
	W385	Yuedao114	3.21914	3.80359	3.51136		3.2975	3.6605	3.479
	W386	Yuedao115	4.23338	4.95082	4.5921		4.30221	4.80502	4.55362
	W387	Yuedao116	4.01905	4.69421	4.35663		4.09651	4.54232	4.31941
	W388	Yuedao117	3.71626	4.33062	4.02344		3.78472	4.19641	3.99056
	W389	Yuedao118	3.73948	4.32205	4.03076		3.81083	4.18638	3.9986
	W390	Yuedao119	1.91161	2.14482	2.02822		1.96241	2.06699	2.0147
	W391	Yuedao120	1.85271	2.08129	1.967		1.90176	2.00549	1.95362
	W392	Yuedao121	3.08683	3.54018	3.3135		3.15436	3.42191	3.28813
	W393	Jia45	1.99391	2.23961	2.11676		2.04675	2.15868	2.10271
	W394	Nannongjing3786	2.35606	2.68589	2.52097		2.41794	2.58654	2.50224
	W395	24248	1.91193	2.13865	2.02529		1.96211	2.06245	2.01228
	W396	Nannongjing4004	2.2222	2.51407	2.36814		2.27987	2.4231	2.35149
	W397	Nannongjing4016	2.04538	2.33438	2.18988		2.10557	2.24059	2.17308
	W398	Zijianwujing	2.04535	2.30778	2.17656		2.09986	2.22284	2.16135
	W399	Ningjing2	2.32006	2.62436	2.47221		2.37856	2.5315	2.45503
	W400	Wuxiang99-8	2.14153	2.42234	2.28194		2.19633	2.33546	2.26589
	W401	Wuyujing8	2.16039	2.4507	2.30555		2.21566	2.36257	2.28912
	W402	Nannongjing002	2.27713	2.57304	2.42509		2.33066	2.48619	2.40842
	W403	Nannongjing004	1.95283	2.18883	2.07083		2.00401	2.11075	2.05738
	W404	Huaidao5hao	2.03425	2.29469	2.16447		2.08434	2.21447	2.14941
	W405	Zhongzuo93	2.22962	2.52758	2.3786		2.28805	2.4354	2.36172
	W406	Yandao9	2.14741	2.44566	2.29654		2.20536	2.35346	2.27941
	W407	Lianjing4	2.01774	2.28818	2.15296		2.07465	2.19971	2.13718
	W408	Jindao1007	2.03671	2.31223	2.17447		2.09663	2.22023	2.15843
	W409	Huajing5	2.09756	2.38171	2.23963		2.15421	2.29233	2.22327
	W410	Huajing6	2.09647	2.37907	2.23777		2.15212	2.29119	2.22165
	W411	Yangfujing7	2.09456	2.40896	2.25176		2.15286	2.31548	2.23417
	W412	Yangfujing8	2.13862	2.42148	2.28005		2.19552	2.33177	2.26364
	W413	Zhendao99	2.11877	2.39832	2.25855		2.17223	2.31245	2.24234
	W414	Nanjing42	2.09351	2.36622	2.22987		2.14545	2.28257	2.21401
	W415	Lianjing9823	1.9395	2.18647	2.06299		1.99035	2.10715	2.04875
	W416	Huifeng1	1.92929	2.18345	2.05637		1.98361	2.09987	2.04174
	W417	Huifeng2	2.10223	2.37639	2.23931		2.1576	2.28974	2.22367
	W418	Yandao8	2.04976	2.31406	2.18191		2.10044	2.23265	2.16655
	W419	Wuyujing21	2.18323	2.47974	2.33149		2.24142	2.38785	2.31464
	W420	Shashani	2.80599	3.20008	3.00303		2.86902	3.09321	2.98111
	W421	Muzhan4	2.0193	2.29202	2.15566		2.07668	2.20297	2.13982
	W422	Mudanjiang29	1.98599	2.26406	2.12503		2.04286	2.1757	2.10928
	W423	Mudanjiang28	2.0775	2.34107	2.20928		2.13198	2.25628	2.19413
	W424	Mudanjiang27	2.57678	2.91058	2.74368		2.63045	2.82086	2.72566
	W425	Kenzhan2	2.12028	2.37894	2.24961		2.173	2.29683	2.23492
	W426	Heijing8	1.93452	2.16963	2.05208		1.98379	2.09319	2.03849
	W427	Hejing1	1.92283	2.17504	2.04893		1.97689	2.09183	2.03436
	W428	Beidao4	2.89312	3.27747	3.08529		2.95537	3.171	3.06318
	W429	Beidao3	2.7128	3.05386	2.88333		2.76768	2.96141	2.86454
	W430	Suijing12	2.69582	3.02528	2.86055		2.75066	2.9337	2.84218
	W431	Songjing12	3.06272	3.48545	3.27409		3.12673	3.374	3.25037
	W432	Songjing11	2.88249	3.32103	3.10176		2.94746	3.20715	3.0773
	W433	Songjing10	2.47692	2.8145	2.64571		2.53683	2.71634	2.62658
	W434	Dongnong430	2.27555	2.59892	2.43724		2.33659	2.50082	2.41871
	W435	Dongnong424	2.50174	2.84246	2.6721		2.56261	2.74326	2.65294
	W436	Longnuo3	2.05878	2.30944	2.18411		2.10206	2.23722	2.16964
	W437	Longjing28	2.07155	2.33434	2.20295		2.12676	2.24881	2.18779
	W438	Longjing27	2.14653	2.43667	2.2916		2.20308	2.34629	2.27469
	W439	Longjing26	2.22384	2.5163	2.37007		2.28034	2.42625	2.3533
	W440	Longjing25	1.9976	2.26169	2.12964		2.05243	2.17589	2.11416
	W441	Longjing24	1.88018	2.10611	1.99314		1.92117	2.0385	1.97983
	W442	Longjing22	2.14751	2.43429	2.2909		2.20304	2.34552	2.27428
	W443	Longjing21	2.33836	2.64519	2.49177		2.39645	2.55241	2.47443
	W444	Longjing20	2.32179	2.64064	2.48122		2.37952	2.5465	2.46301
	W445	Longjing19	2.49468	2.831	2.66284		2.55224	2.73552	2.64388
	W446	Longjing18	2.55356	2.90152	2.72754		2.61277	2.80311	2.70794
	W447	Longjing17	2.0002	2.27617	2.13818		2.05591	2.18816	2.12203
	W448	Longjing16	2.62652	3.01157	2.81904		2.69054	2.90444	2.79749
	W449	Longjing15	2.25424	2.55609	2.40517		2.31245	2.46349	2.38797
	W450	Zhonglongdao1	2.06938	2.3213	2.19534		2.12222	2.23965	2.18094
	W451	Zongdao8	2.25194	2.5609	2.40642		2.31757	2.46037	2.38897
	W452	Longdao6	1.96421	2.23556	2.09988		2.02085	2.14804	2.08445
	W453	Longdao5	2.04987	2.32354	2.18671		2.10418	2.23786	2.17102
	W454	Longdao4	2.0236	2.29503	2.15932		2.07855	2.20853	2.14354
	W455	Kendao19	2.26249	2.57476	2.41863		2.32206	2.47943	2.40075
	W456	Kendao18	2.52737	2.85932	2.69334		2.58402	2.76538	2.6747
	W457	Kendao12	2.68983	3.07324	2.88154		2.75181	2.96827	2.86004
	W458	Kendao13	2.18028	2.46006	2.32017		2.23433	2.37379	2.30406
	W459	Kendao20	2.17262	2.44707	2.30985		2.22511	2.36331	2.29421
	W460	Longdun106	2.34962	2.65873	2.50417		2.41348	2.56072	2.4871
	W461	Longdun105	2.33692	2.66007	2.4985		2.3913	2.56896	2.48013
	W462	Sanjiang2	5.08445	5.92259	5.50352		5.16307	5.75438	5.45873
	W463	Nongxiang21	5.4542	6.42795	5.94107		5.53738	6.24097	5.88918
	W464	Nongxiang25	5.5979	6.60284	6.10037		5.67625	6.41738	6.04682
	W465	Nongxiang26	5.44068	6.38301	5.91184		5.51726	6.20781	5.86254
	W466	Yuzhenxiang	5.83048	6.895	6.36274		5.90252	6.71191	6.30721
	W467	Xiangwanxian17	5.44653	6.39692	5.92173		5.52857	6.21393	5.87125
	W468	Huanghuazhan	5.24701	6.21444	5.73072		5.29292	6.06894	5.68093
	W469	Fengyouwan8	5.64183	6.68956	6.1657		5.721	6.50033	6.11066
	W470	Ribenqing	2.13668	2.4188	2.27774		2.192	2.3308	2.2614
	W471	Tijin	2.15149	2.45207	2.30178		2.21272	2.35655	2.28464
	W472	M1004	2.37777	2.7029	2.54034		2.43927	2.60416	2.52171
	W473	Zhongguo91	2.39467	2.74104	2.56786		2.45709	2.63929	2.54819
	W474	Qiutainxiaoding	2.13869	2.4221	2.28039		2.1955	2.33258	2.26404
	W475	Cai	2.20956	2.4863	2.34793		2.26277	2.4016	2.33219
	W476	Qiuguang	2.07133	2.33349	2.20241		2.1255	2.24916	2.18733
	W477	Kangbingyueguang	2.14705	2.43166	2.28936		2.20234	2.3439	2.27312
	W478	Youzhiyueguang	2.15913	2.4456	2.30236		2.21451	2.35742	2.28597
	W479	Kasala	2.96882	3.45236	3.21059		3.03938	3.3272	3.18329
	W480	Xiangchuanwuxinbaimi	2.82687	3.29067	3.05877		2.89515	3.17025	3.0327
	W481	Dongzheng1640	2.06873	2.33019	2.19946		2.10945	2.25917	2.18431
	W482	Dongzhengwuyujing21	2.05684	2.30627	2.18156		2.10602	2.22888	2.16745
	W483	Heimixiandao	4.27767	5.19516	4.73642		4.35595	5.02518	4.69056
	W484	Heimijingdao	2.23093	2.52179	2.37636		2.287	2.43256	2.35978
	W485	Zidao	1.78491	2.00307	1.89399		1.83318	1.9295	1.88134
	W486	9311	3.73988	4.33817	4.03902		3.81843	4.19621	4.00732
	W487	Zacaodao	2.0687	2.34564	2.20717		2.12519	2.25722	2.19121
	W488	Youmang429	2.05757	2.34142	2.1995		2.11451	2.25197	2.18324
	W489	Wanqu429	2.05165	2.33122	2.19144		2.11148	2.23898	2.17523
	W490	Zhili429	2.03783	2.30804	2.17293		2.09682	2.21756	2.15719
	W491	Si4029	2.03877	2.31588	2.17732		2.09416	2.22867	2.16141
	W492	Si4031	2.06891	2.33686	2.20288		2.11671	2.25813	2.18742
	W493	Si4033	2.16373	2.43656	2.30015		2.21782	2.35143	2.28463
	W494	Si4039	2.35322	2.66734	2.51028		2.40989	2.57501	2.49245
	W495	Si4040	2.28476	2.61807	2.45141		2.34582	2.51894	2.43238
	W496	Si4041	1.94612	2.21342	2.07977		2.00274	2.12567	2.0642
	W497	Si4049	2.03838	2.3255	2.18194		2.09703	2.23318	2.16511
	W498	Si4079	2.1906	2.48553	2.33806		2.24737	2.39435	2.32086
	W499	Si4081	2.46613	2.79056	2.62835		2.52393	2.69622	2.61008
	W500	Si4082	2.15688	2.46431	2.3106		2.21471	2.37229	2.2935
	W501	Si4139	2.02866	2.31373	2.1712		2.08816	2.22155	2.15485
	W502	Si4152	2.25137	2.55314	2.40226		2.30927	2.46128	2.38527
	W503	Si4161	2.2038	2.49395	2.34887		2.25939	2.40559	2.33249
	W504	Si4229	2.20212	2.30002	2.25107		2.07297	2.41471	2.24384
	W505	Si4230	2.14412	2.22803	2.18608		2.01622	2.34174	2.17898
	W506	Si4251	2.14753	2.24044	2.19398		2.02071	2.35309	2.1869
	W507	Si4252	2.27486	2.37891	2.32688		2.15006	2.48854	2.3193
	W508	Si4259	2.10492	2.17982	2.14237		1.98314	2.28785	2.1355
	W509	Si4263	2.24646	2.3486	2.29753		2.12094	2.45943	2.29018
	W510	Si4280	2.1589	2.24341	2.20115		2.03258	2.35523	2.19391
	W511	Si4330	3.39309	3.65323	3.52316		3.23602	3.78178	3.5089
	W512	Si4360	2.37429	2.47755	2.42592		2.24969	2.58653	2.41811
	W513	Si4364	2.25719	2.35119	2.30419		2.132	2.46127	2.29664
	W514	Digudao	2.2538	2.34484	2.29932		2.12903	2.45447	2.29175
	W515	Si4385	2.16432	2.24783	2.20608		2.0361	2.36184	2.19897
	W516	Si4386	4.70735	5.27003	4.98869		4.52073	5.40875	4.96474
	W517	Sihao4141	2.1503	2.23554	2.19292		2.02304	2.34869	2.18586
	W518	Ningjinghui096	2.21262	2.2986	2.25561		2.09275	2.40379	2.24827
	W519	Ningjinghui117	2.18817	2.27886	2.23352		2.06372	2.38873	2.22623
	W520	Ningjinghui145	2.56011	2.71686	2.63848		2.42758	2.83207	2.62982
	W521	Ningjinghui166	2.31077	2.41981	2.36529		2.18339	2.53174	2.35757
	W522	Ningjinghui208	2.19938	2.29859	2.24899		2.07522	2.40834	2.24178
	W523	Ningjinghui210	2.24994	2.35211	2.30103		2.1264	2.46085	2.29362
	W524	Ningjinghui237	2.44934	2.57878	2.51406		2.32474	2.68684	2.50579
	W525	Ningjinghui246	2.31341	2.42745	2.37043		2.18847	2.53678	2.36263
	W526	Ningjinghui260	2.45127	2.55824	2.50476		2.32178	2.67089	2.49634
	W527	Ningjinghui285	2.35398	2.45019	2.40209		2.22544	2.56338	2.39441
	W528	Ningjinghui286	2.18382	2.26637	2.22509		2.06324	2.37246	2.21785
	W529	Ningjinghui290	2.14663	2.22771	2.18717		2.03233	2.327	2.17967
	W530	Ningjinghui292	2.34231	2.47385	2.40808		2.20774	2.59279	2.40026
	W531	Ningjinghui293	2.72006	2.87802	2.79904		2.58298	2.99542	2.7892
	W532	Ningjinghui296	2.36874	2.48762	2.42818		2.23609	2.60371	2.4199
	W533	Ningjinghui298	2.31933	2.42396	2.37165		2.19283	2.53448	2.36365
	W534	Ningjinghui338	2.07734	2.14951	2.11343		1.95846	2.25473	2.1066
	W535	Hongyin1009	2.12192	2.2057	2.16381		2.00294	2.31096	2.15695
	W536	Hongyin1010	2.27177	2.37198	2.32187		2.1442	2.48455	2.31437
	W537	Hongyin1011	2.21661	2.31989	2.26825		2.08977	2.43272	2.26125
	W538	Hongyin1012	2.07454	2.14318	2.10886		1.95097	2.25364	2.10231
	W539	Cai1	2.28611	2.394	2.34006		2.15219	2.51326	2.33272
	W540	Nannongjing1R	2.52713	2.68773	2.60743		2.39324	2.80466	2.59895
	W541	Nannongjing2R	2.24725	2.35099	2.29912		2.11274	2.47061	2.29168
	W542	Nannongjing3R	2.265	2.35468	2.30984		2.137	2.46731	2.30216
	W543	Ningjing1R-34	2.13282	2.2104	2.17161		2.01207	2.31727	2.16467
	W544	Ningjing1R-38	2.45949	2.60591	2.5327		2.32344	2.72535	2.5244
	W545	Ningjing1R-39	2.19311	2.27391	2.23351		2.07097	2.38145	2.22621
	W546	Ningjing1R-43	2.12535	2.19408	2.15972		2.00697	2.29857	2.15277
	W547	Ningjing1R-45	2.16709	2.24325	2.20517		2.05071	2.3453	2.198
	W548	Ningjing1R-97	2.13564	2.21009	2.17286		2.01715	2.31478	2.16597
	W549	Ningjing1R-99	2.37036	2.47259	2.42147		2.24545	2.58148	2.41346
	W550	Ningjing1R-108	2.25043	2.33539	2.29291		2.12855	2.44226	2.2854
	W551	Ningjing1R-122	2.31089	2.40839	2.35964		2.18462	2.51918	2.3519
	W552	Ningjing1R-125	2.20143	2.28871	2.24507		2.07886	2.39681	2.23783
	W553	Ningjing1R-126	2.18255	2.26073	2.22164		2.06142	2.36752	2.21447
	W554	Ningjing1R-128	2.28997	2.38453	2.33725		2.16757	2.49176	2.32966
	W555	Ningjing1R-129	2.16864	2.24938	2.20901		2.04529	2.35862	2.20195
	W556	Ningjing1R-130	2.11822	2.1882	2.15321		2.00092	2.29193	2.14643
	W557	Ningjing1R-132	2.20363	2.28993	2.24678		2.07589	2.40303	2.23946
	W558	Ningjing1R-133	2.16382	2.23787	2.20084		2.04314	2.34441	2.19378
	W559	Ningjing1R-35	2.26467	2.36466	2.31467		2.13942	2.47485	2.30714
	W560	Ningjing1R-36	2.19928	2.2871	2.24319		2.07479	2.39688	2.23584
	W561	Ningjing1R-37	2.18884	2.2803	2.23457		2.06325	2.39136	2.2273
	W562	Ningjing1R-40	2.09851	2.16638	2.13245		1.98243	2.26884	2.12563
	W563	Ningjing1R-41	2.18967	2.26835	2.22901		2.0658	2.378	2.2219
	W564	Ningjing1R-42	2.54865	2.69929	2.62397		2.40992	2.82047	2.6152
	W565	Ningjing1R-44	2.12704	2.20199	2.16452		2.00732	2.30787	2.1576
	W566	Ningjing1R-47	2.55406	2.69206	2.62306		2.42028	2.80736	2.61382
	W567	Ningjing1R-50	2.2426	2.3375	2.29005		2.12142	2.44398	2.2827
	W568	Ningjing1R-53	2.63928	2.80169	2.72049		2.49825	2.92463	2.71144
	W569	Ningjing1R-56	2.11769	2.18747	2.15258		1.99851	2.2932	2.14586
	W570	Ningjing1R-104	2.03875	2.10413	2.07144		1.91823	2.21171	2.06497
	W571	Ningjing1R-107	2.15872	2.24365	2.20118		2.037	2.35147	2.19424
	W572	Ningjing1R-111	2.15215	2.23055	2.19135		2.02794	2.34077	2.18435
	W573	Ningjing1R-114	2.20093	2.28519	2.24306		2.07383	2.39747	2.23565
	W574	Ningjing1R-115	2.26346	2.35311	2.30828		2.14144	2.46025	2.30084
	W575	Ningjing1R-117	2.19909	2.29012	2.24461		2.07309	2.40145	2.23727
	W576	Ningjing1R-123	2.26888	2.36264	2.31576		2.13862	2.47733	2.30798
	W577	Ningjing1R-127	2.16047	2.24275	2.20161		2.03217	2.35692	2.19455
	W578	Ningjing1R-131	2.29729	2.40459	2.35094		2.16838	2.51748	2.34293
	W579	Ningjing1R-21	2.28133	2.37547	2.3284		2.15328	2.48861	2.32095
	W580	Ningjing1R-26	2.15323	2.22816	2.1907		2.02944	2.33771	2.18358
	W581	Ningjing1R-30	2.27661	2.36613	2.32137		2.15299	2.47446	2.31372
	W582	Ningjing1R-68	2.09851	2.16403	2.13127		1.98112	2.26777	2.12444
	W583	Ningjing1R-70	2.16355	2.24766	2.20561		2.0411	2.3562	2.19865
	W584	Ningjing1R-118	3.23485	3.46781	3.35133		3.07386	3.60199	3.33793
	W585	Ningjing1R-137	2.02459	2.08759	2.05609		1.90716	2.19193	2.04955
	W586	Ningjing1R-143	2.00084	2.0535	2.02717		1.88001	2.16155	2.02078
	W587	Ningjing1R-134	2.37785	2.481	2.42943		2.24809	2.5945	2.4213
	W588	Ningjing1R-135	2.22573	2.31993	2.27283		2.09811	2.4325	2.2653
	W589	Ningjing1R-136	2.36762	2.47139	2.4195		2.24002	2.58252	2.41127
	W590	Ningjing1R-138	2.09785	2.16846	2.13316		1.97611	2.27645	2.12628
	W591	Ningjing1R-139	2.2681	2.36178	2.31494		2.1431	2.4714	2.30725
	W592	Ningjing1R-140	2.18264	2.26285	2.22275		2.06312	2.36772	2.21542
	W593	Ningjing1R-141	2.29119	2.38593	2.33856		2.16864	2.49335	2.33099
	W594	Ningjing1R-142	2.29766	2.38931	2.34348		2.1689	2.50296	2.33593
	W595	Ningjing1R-144	2.29117	2.39332	2.34224		2.16786	2.50185	2.33485
	W596	Ningjing1R-18	2.04942	2.11971	2.08457		1.92474	2.23123	2.07799
	W597	Ningjing1R-59	2.37323	2.4833	2.42826		2.24576	2.59495	2.42036
	W598	Ningjing1R-60	2.06275	2.12515	2.09395		1.93601	2.23868	2.08735
	W599	Ningjing1R-61	2.12438	2.19663	2.16051		2.00549	2.30156	2.15353
	W600	Ningjing1R-62	2.00858	2.07196	2.04027		1.89442	2.17315	2.03379
	W601	Ningjing1R-63	2.08908	2.16222	2.12565		1.97621	2.26172	2.11897
	W602	Ningjing1R-100	2.24726	2.34172	2.29449		2.12516	2.44882	2.28699
	W603	Ningjing1R-102	2.12235	2.19618	2.15926		2.00126	2.30311	2.15219
	W604	Ningjing1R-124	2.20322	2.27663	2.23992		2.08762	2.37806	2.23284
	W605	Ningjing1R-55	2.18032	2.25807	2.2192		2.06504	2.35916	2.2121
	W606	Ningjing1R-101	2.13589	2.20892	2.17241		2.01734	2.31328	2.16531
	W607	Ningjing1R-109	2.04335	2.1096	2.07647		1.92747	2.21233	2.0699
	W608	Ningjing1R-110	2.12427	2.20278	2.16353		2.00401	2.30934	2.15667
	W609	Ningjing1R-112	2.13682	2.21411	2.17547		2.01045	2.32427	2.16736
	W610	Ningjing1R-116	2.14084	2.21151	2.17617		2.02108	2.31721	2.16914
	W611	Ningjing1R-149	2.16433	2.24843	2.20638		2.048	2.35032	2.19916
	W612	Ningjing1R-13	2.13145	2.21116	2.17131		2.01678	2.31163	2.16421
	W613	Ningjing1R-15	2.27962	2.37028	2.32495		2.16083	2.47406	2.31744
	W614	Ningjing1R-17	2.17301	2.2615	2.21726		2.05382	2.36602	2.20992
	W615	Ningjing1R-22	2.23585	2.33099	2.28342		2.10913	2.44232	2.27573
	W616	Ningjing1R-24	2.1988	2.28216	2.24048		2.07885	2.38741	2.23313
	W617	Ningjing1R-27	2.24778	2.33426	2.29102		2.12756	2.43933	2.28345
	W618	Ningjing1R-28	2.268	2.36243	2.31521		2.14387	2.47116	2.30751
	W619	Ningjing1R-31	2.17668	2.25872	2.2177		2.05692	2.36422	2.21057
	W620	Ningjing1R-32	2.14805	2.23008	2.18906		2.02573	2.33849	2.18211
	W621	Ningjing1R-33	2.15445	2.20615	2.1803		2.01586	2.33374	2.1748
	W622	Ningjing1R-69	2.13619	2.18439	2.16029		2.0076	2.30195	2.15478
	W623	Ningjing1R-46	2.25253	2.32992	2.29122		2.10209	2.46985	2.28597
	W624	Ningjing1R-48	2.11369	2.1612	2.13745		1.98036	2.28366	2.13201
	W625	Ningjing1R-49	2.35728	2.42516	2.39122		2.21823	2.55224	2.38524
	W626	Ningjing1R-52	2.12171	2.17108	2.14639		1.98358	2.29821	2.1409
	W627	Ningjing1R-54	2.13821	2.18383	2.16102		2.00557	2.30474	2.15516
	W628	Ningjing1R-57	2.99643	3.1631	3.07976		2.81344	3.33045	3.07194
